# Supplementary material for: DFT study on MgAl-layered double hydroxides with different interlayer anions: structure, anion exchange, host–guest interaction and basic sites
Source: Royal Society of Chemistry journal article supplement (doi:10.1039/c9cp05529k), 2019-12-21
Supplement: c9cp05529k1.pdf [file c9cp05529k1.pdf]

**Electronic Supplementary Information**

**for**

**DFT study on MgAl-layered double hydroxides with different interlayer  
anions: structure, anion exchange, host-guest interaction and basic sites**

Hui-Min Liu,<sup>‡</sup> Xiao-Jie Zhao,<sup>‡</sup> Yu-Quan Zhu, Hong Yan\*

*State Key Laboratory of Chemical Resource Engineering, College of Chemistry, Beijing University of*

*Chemical Technology, 100029, Beijing, P. R. China*

**Corresponding Authors**

\*(H. Y.) Tel: +86-010-64448331. E-mail: [yanhong@mail.buct.edu.cn](mailto:yanhong@mail.buct.edu.cn).

<sup>‡</sup> These authors contributed equally to this work.

| Item                      | Title                                                                                                                                                                                                                                                                                                                                                                                                                                                                                                                                                         |                     |
|---------------------------|---------------------------------------------------------------------------------------------------------------------------------------------------------------------------------------------------------------------------------------------------------------------------------------------------------------------------------------------------------------------------------------------------------------------------------------------------------------------------------------------------------------------------------------------------------------|---------------------|
| Supplemented illustration | The determination of the cut-off energy                                                                                                                                                                                                                                                                                                                                                                                                                                                                                                                       | Fig. S1             |
|                           | The determination of computational model                                                                                                                                                                                                                                                                                                                                                                                                                                                                                                                      | Fig. S2<br>Table S1 |
|                           | The effect of the interlayer water molecules on the interlayer spacing of Mg <sub>2</sub> Al-Cl-LDHs                                                                                                                                                                                                                                                                                                                                                                                                                                                          | Fig. S3<br>Table S3 |
|                           | The effect of the charges of the interlayer anions on the binding energies of MgAl-A-LDHs                                                                                                                                                                                                                                                                                                                                                                                                                                                                     |                     |
|                           | The interaction between interlayer anions and water molecules                                                                                                                                                                                                                                                                                                                                                                                                                                                                                                 | Fig. S6<br>Fig. S7  |
|                           | The calculated energies of Mg <sub>2</sub> Al-Cl-LDHs under the cut-off energies ranging from 300 eV to 540 eV.                                                                                                                                                                                                                                                                                                                                                                                                                                               | Fig. S1             |
|                           | The optimized structures of three model (a) 1H, supercell 6×6×1; (b) 3R, supercell 3×3×3; (c) 1H, supercell 6×6×3.                                                                                                                                                                                                                                                                                                                                                                                                                                            | Fig. S2             |
|                           | The experimental and calculated lattice parameters of Mg <sub>2</sub> Al-Cl-LDHs.                                                                                                                                                                                                                                                                                                                                                                                                                                                                             | Table S1            |
|                           | The radii of different anions, the interlayer distances and total energies of MgAl-A-LDHs with different anions (F <sup>-</sup> , Cl <sup>-</sup> , Br <sup>-</sup> , I <sup>-</sup> , OH <sup>-</sup> , NO <sub>3</sub> <sup>-</sup> , CO <sub>3</sub> <sup>2-</sup> , SO <sub>4</sub> <sup>2-</sup> and PO <sub>4</sub> <sup>3-</sup> ) and different <i>R</i> (Mg <sup>2+</sup> /Al <sup>3+</sup> )                                                                                                                                                        | Table S2            |
|                           | The interlayer distance of Mg <sub>2</sub> Al-Cl-LDHs intercalated with different number of water molecules.                                                                                                                                                                                                                                                                                                                                                                                                                                                  | Fig. S3             |
|                           | The energies of ions and water                                                                                                                                                                                                                                                                                                                                                                                                                                                                                                                                | Table S3            |
|                           | The interlayer distances <i>d</i> of Mg <sub>2</sub> Al-Cl-LDHs with different number of interlayer H <sub>2</sub> O                                                                                                                                                                                                                                                                                                                                                                                                                                          | Table S4            |
|                           | The optimized structures of Mg <sub>n</sub> Al-A-LDHs intercalated with different anions (A= F <sup>-</sup> , Cl <sup>-</sup> , Br <sup>-</sup> , I <sup>-</sup> , OH <sup>-</sup> , NO <sub>3</sub> <sup>-</sup> , CO <sub>3</sub> <sup>2-</sup> , SO <sub>4</sub> <sup>2-</sup> , PO <sub>4</sub> <sup>3-</sup> ), for monovalent anions and divalent anions, <i>n</i> =1.6, 2.0, 2.6, 3.5, 5.0 and 8.0; for trivalent anions, <i>n</i> = 1.4, 2.0, 3.0, 5.0 and 8.0 ). The color of each element is listed.                                                | Fig. S4             |
|                           | The electronic density difference of layers of MgAl-A-LDHs interlayered with different anions (A= F <sup>-</sup> , Cl <sup>-</sup> , Br <sup>-</sup> , I <sup>-</sup> , OH <sup>-</sup> , NO <sub>3</sub> <sup>-</sup> , CO <sub>3</sub> <sup>2-</sup> , SO <sub>4</sub> <sup>2-</sup> , PO <sub>4</sub> <sup>3-</sup> ) and different <i>R</i> (Mg <sup>2+</sup> /Al <sup>3+</sup> ) under the top view. The color of each element is listed.                                                                                                                | Fig. S5             |
|                           | The electronic density difference of interlayer species of Mg <sub>2</sub> Al-A-LDHs interlayered with different anions (A= F <sup>-</sup> , Cl <sup>-</sup> , Br <sup>-</sup> , I <sup>-</sup> , OH <sup>-</sup> , NO <sub>3</sub> <sup>-</sup> , CO <sub>3</sub> <sup>2-</sup> , SO <sub>4</sub> <sup>2-</sup> and PO <sub>4</sub> <sup>3-</sup> ) under the top view, along with the distances between the H atom (H) of water and halogen anions (X) ( <i>d</i> <sub>X H</sub> ) or O atoms within oxygen acid anions ( <i>d</i> <sub>O H</sub> ) (in Å). | Fig. S6             |

|  |                                                                                                                                                                                                                                                                                                                                                                     |         |
|--|---------------------------------------------------------------------------------------------------------------------------------------------------------------------------------------------------------------------------------------------------------------------------------------------------------------------------------------------------------------------|---------|
|  | The electronic density difference of interlayer species of MgAl-A-LDHs interlayered with different anions ( $A = F^-$ , $Cl^-$ , $Br^-$ , $I^-$ , $OH^-$ , $NO_3^-$ , $CO_3^{2-}$ , $SO_4^{2-}$ , $PO_4^{3-}$ ) and different $R$ ( $Mg^{2+}/Al^{3+}$ ) under the top view. The color of each element is listed.                                                    | Fig. S7 |
|  | The electronic density difference of the layer and interlayer species of MgAl-A-LDHs interlayered with different anions ( $A = F^-$ , $Cl^-$ , $Br^-$ , $I^-$ , $OH^-$ , $NO_3^-$ , $CO_3^{2-}$ , $SO_4^{2-}$ , $PO_4^{3-}$ ) and different $R$ ( $Mg^{2+}/Al^{3+}$ ) (side view). The color of each element is listed.                                             | Fig. S8 |
|  | Total density of states (TDOS) and partial density of states (PDOS) for the MgAl-A-LDHs intercalated with different interlayer anions ( $A = F^-$ , $Cl^-$ , $Br^-$ , $I^-$ , $OH^-$ , $NO_3^-$ , $CO_3^{2-}$ , $SO_4^{2-}$ , $PO_4^{3-}$ ) and different $R$ ( $Mg^{2+}/Al^{3+}$ ). The Fermi energy is shown as a dashed vertical line, and has been set as 0 eV. | Fig. S9 |

1

2

## 1 *The determination of the cut-off energy*

2 According to the state of the art, the cut-off energy applied in the plane wave basis set ranges from

3 340 eV to 540 eV<sup>S1-S3</sup>. Increasing the value of the cut-off energy can aggrandize the accuracy of the

4 calculation, with the augmented computational cost at the same time. In this work, the geometry of model

5 Mg<sub>2</sub>Al-Cl-LDHs was optimized under the cut-off energy ranging from 300 eV to 540 eV. The energy of

6 Mg<sub>2</sub>Al-Cl-LDHs is thus calculated to be -64540.3637 eV with the cut-off energy of 340 eV, and

7 -64544.1677 eV with the cut-off energy of 540 eV. Therefore, the difference of the calculation results

8 under the cut-off energy of 340 eV and 580 eV is 3.8 eV. Given that the model of Mg<sub>2</sub>Al-Cl-LDHs contains

9 210 atoms, the difference under the cut-off energy of 340 eV and 580 eV is about 0.02 eV/atom. Thus, the

10 cut-off energy of 340 eV is applied in this work.

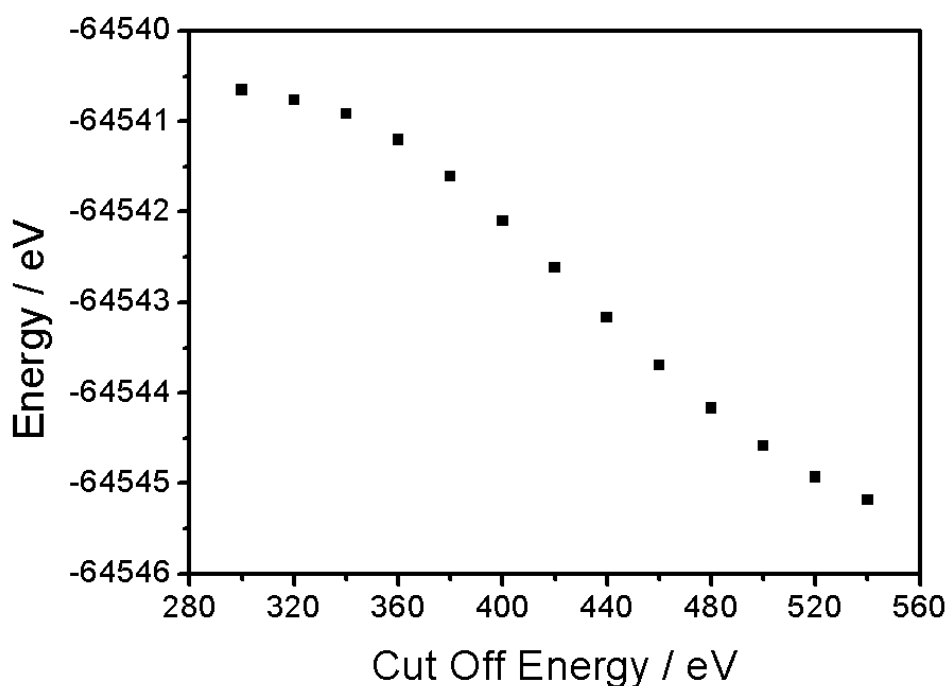

11  
12 **Fig. S1.** The calculated energies of Mg<sub>2</sub>Al-Cl-LDHs under the cut-off energies ranging from 300 eV to 540 eV.

# 1    *The determination of computational model*

2            The stacking sequences of the layers of LDHs include three types: three-layer rhombohedral polytype  
3    hydrotalcite (the 3R polytype), two-layer hexagonal polytype manasseite (the 2H polytype) and one-layer  
4    hexagonal polytype manasseite (the 1H polytype).<sup>S4</sup> For LDHs, the properties of hydroxide layers and  
5    interlayer species in different layers are similar, so we only selected LDHs in 1H and 3R configurations for  
6    verification. We optimized three models of Mg<sub>2</sub>Al-Cl-LDHs: (1) 1H, supercell 6×6×1; (2) 3R, supercell  
7    3×3×3; (3) 1H, supercell 6×6×3. The optimized structures are shown in Fig. S2. The lattice parameters of  
8    three optimized geometries are similar and agree well with the experimental observations, and the relative  
9    error is less than 3% (Table S3). Thus, in order to make rational use of computing resources and better  
10   research the properties of metal hydroxide layer and interlayer species, the models with 6×6×1 supercell  
11   and 1H stacking sequences are employed in this work.

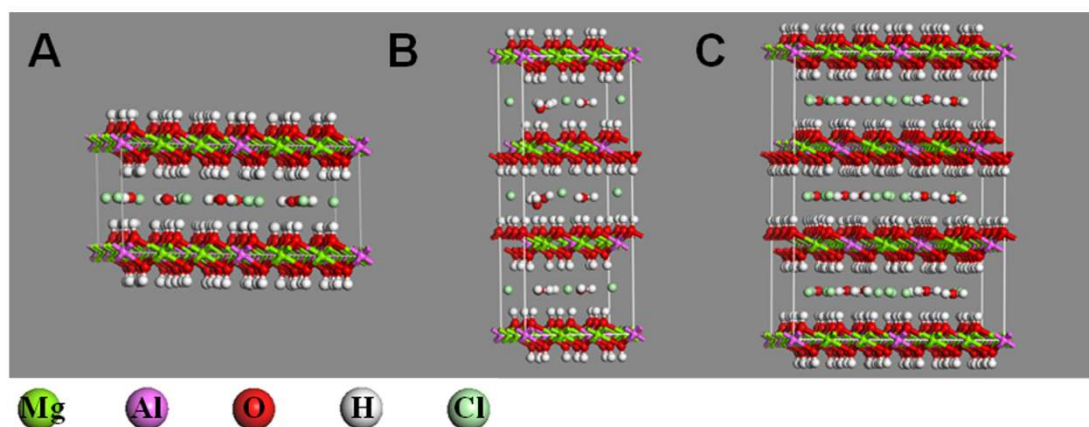

12            **Fig. S2.** The optimized structures of three model of Mg<sub>2</sub>Al-Cl-LDHs (a) 1H, supercell 6×6×1; (b) 3R, supercell 3×3×3;  
13            (c) 1H, supercell 6×6×3.

14            **Table S1.** The experimental and calculated lattice parameters of Mg<sub>2</sub>Al-Cl-LDHs

|       | Stacking sequence | Molecular formula                                   | Supercell | Lattice parameters    |                    |
|-------|-------------------|-----------------------------------------------------|-----------|-----------------------|--------------------|
|       |                   |                                                     |           | $a=b/\text{\AA}$      | $c/\text{\AA}$     |
| Exptl | 3R                | Mg <sub>2</sub> Al-Cl                               |           | 3.08 <sup>S5-S6</sup> | 7.86 <sup>S7</sup> |
|       | 1H                | Mg <sub>24</sub> Al <sub>12</sub> -Cl <sub>12</sub> | 6×6×1     | 3.09                  | 7.57               |
| Calcd | 3R                | Mg <sub>18</sub> Al <sub>9</sub> -Cl <sub>9</sub>   | 3×3×3     | 3.10                  | 7.64               |
|       | 3R                | Mg <sub>73</sub> Al <sub>36</sub> -Cl <sub>36</sub> | 6×6×3     | 3.10                  | 7.78               |

1

2 **Table S2.** The radii of different anions, the interlayer distances and total energies of MgAl-A-LDHs with different anions3 ( $\text{F}^-$ ,  $\text{Cl}^-$ ,  $\text{Br}^-$ ,  $\text{I}^-$ ,  $\text{OH}^-$ ,  $\text{NO}_3^-$ ,  $\text{CO}_3^{2-}$ ,  $\text{SO}_4^{2-}$  and  $\text{PO}_4^{3-}$ ) and different  $R$  ( $\text{Mg}^{2+}/\text{Al}^{3+}$ )

| A                  | Anion radius/ Å | $R$ | Interlayer distance/Å | Total energy/ eV |
|--------------------|-----------------|-----|-----------------------|------------------|
| $\text{F}^-$       | 1.33            | 1.6 | 7.39                  | -67070.4531      |
|                    |                 | 2.0 | 7.42                  | -67578.6908      |
|                    |                 | 2.6 | 7.45                  | -68082.7397      |
|                    |                 | 3.5 | 7.68                  | -68588.6431      |
|                    |                 | 5.0 | 7.73                  | -69093.4190      |
|                    |                 | 8.0 | 7.73                  | -69598.7035      |
| $\text{Cl}^-$      | 1.81            | 1.6 | 7.64                  | -63520.0304      |
|                    |                 | 2.0 | 7.67                  | -64536.8778      |
|                    |                 | 2.6 | 7.72                  | -65548.7571      |
|                    |                 | 3.5 | 7.88                  | -66561.4560      |
|                    |                 | 5.0 | 7.78                  | -67573.0327      |
|                    |                 | 8.0 | 7.96                  | -68586.1550      |
| $\text{Br}^-$      | 1.96            | 1.6 | 7.88                  | -62921.5666      |
|                    |                 | 2.0 | 7.89                  | -64022.9029      |
|                    |                 | 2.6 | 7.93                  | -65121.8000      |
|                    |                 | 3.5 | 7.97                  | -66218.6738      |
|                    |                 | 5.0 | 8.05                  | -67317.6805      |
|                    |                 | 8.0 | 8.13                  | -68415.2103      |
| $\text{I}^-$       | 2.20            | 1.6 | 8.30                  | -62180.0446      |
|                    |                 | 2.0 | 8.28                  | -63388.2635      |
|                    |                 | 2.6 | 8.44                  | -64592.6774      |
|                    |                 | 3.5 | 8.58                  | -65797.2824      |
|                    |                 | 5.0 | 8.54                  | -67000.2547      |
|                    |                 | 8.0 | 8.67                  | -68203.2238      |
| $\text{OH}^-$      | 1.19            | 1.6 | 7.30                  | -64123.5677      |
|                    |                 | 2.0 | 7.33                  | -65050.7375      |
|                    |                 | 2.6 | 6.31                  | -65977.4790      |
|                    |                 | 3.5 | 7.32                  | -66903.2502      |
|                    |                 | 5.0 | 7.45                  | -67830.3417      |
|                    |                 | 8.0 | 7.46                  | -68757.0143      |
| $\text{NO}_3^-$    | 1.65            | 1.6 | 8.79                  | -79868.8771      |
|                    |                 | 2.0 | 8.94                  | -78549.5069      |
|                    |                 | 2.6 | 7.88                  | -77225.8109      |
|                    |                 | 3.5 | 7.78                  | -75904.3320      |
|                    |                 | 5.0 | 7.86                  | -74580.7171      |
|                    |                 | 8.0 | 7.92                  | -73257.0735      |
| $\text{CO}_3^{2-}$ | 1.64            | 1.6 | 7.32                  | -68042.0411      |

|                               |      |     |      |             |
|-------------------------------|------|-----|------|-------------|
|                               |      | 2.0 | 6.78 | -68411.9841 |
|                               |      | 2.6 | 7.31 | -68777.3695 |
|                               |      | 3.5 | 7.35 | -69142.9019 |
|                               |      | 5.0 | 7.55 | -69508.4645 |
|                               |      | 8.0 | 7.53 | -69875.9562 |
| SO <sub>4</sub> <sup>2-</sup> | 2.44 | 1.6 | 8.52 | -71960.6140 |
|                               |      | 2.0 | 8.57 | -71769.2235 |
|                               |      | 2.6 | 8.54 | -71576.6295 |
|                               |      | 3.5 | 8.64 | -71383.7383 |
|                               |      | 5.0 | 9.01 | -71189.9591 |
|                               |      | 8.0 | 8.94 | -70995.1161 |
| PO <sub>4</sub> <sup>3-</sup> | 2.38 | 1.4 | 8.41 | -66497.1396 |
|                               |      | 2.0 | 8.30 | -67326.7635 |
|                               |      | 3.0 | 8.54 | -68154.2048 |
|                               |      | 5.0 | 8.59 | -68971.7376 |
|                               |      | 8.0 | 8.70 | -70452.6313 |

**Table S3.** The energies of ions and water

| Energies of ions and water/ eV |                  |                 |                 |                |                 |                |                              |                               |                               |                               |                  |  |
|--------------------------------|------------------|-----------------|-----------------|----------------|-----------------|----------------|------------------------------|-------------------------------|-------------------------------|-------------------------------|------------------|--|
| Mg <sup>2+</sup>               | Al <sup>3+</sup> | OH <sup>-</sup> | Cl <sup>-</sup> | F <sup>-</sup> | Br <sup>-</sup> | I <sup>-</sup> | NO <sub>3</sub> <sup>-</sup> | CO <sub>3</sub> <sup>2-</sup> | SO <sub>4</sub> <sup>2-</sup> | PO <sub>4</sub> <sup>3-</sup> | H <sub>2</sub> O |  |
| -957.78                        | -35.98           | -453.62         | -411.67         | -664.23        | -369.14         | -316.56        | -1579.73                     | -1467.84                      | -2028.28                      | -1933.32                      | -468.72          |  |

#### *The effect of the interlayer water molecules on the interlayer spacing of Mg<sub>2</sub>Al-Cl-LDHs*

Fig. S3 shows the interlayer spacing of Mg<sub>2</sub>Al-Cl-LDHs containing 1, 2, 3, 4, 5, 6, 8, 10, 15, 20 numbers of water molecules. It is obvious that the interlayer spacing of LDHs increases with the increase of the number of interlayer H<sub>2</sub>O, since more water molecules occupy more interlayer space, and the orientation of water changes from one layer to more than 2 layers. This finding also agrees well with the experimental and simulation results that the number of interlayer water molecules heavily influence the swelling property of LDHs.<sup>50,51</sup>

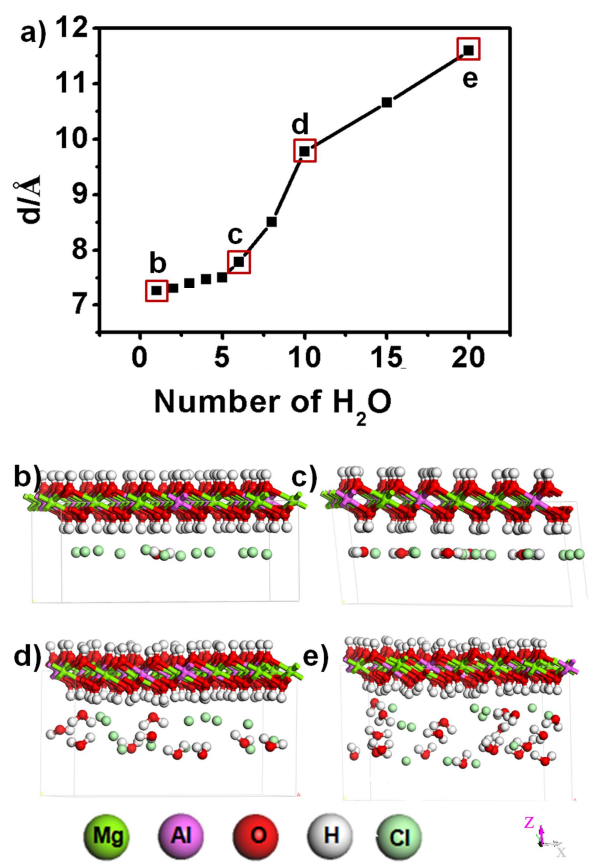

**Fig. S3.** The interlayer distance of Mg<sub>2</sub>Al-Cl-LDHs intercalated with different number of interlayer water molecules.

**Table S4.** The interlayer distances  $d$  of Mg<sub>2</sub>Al-Cl-LDHs with different number of interlayer H<sub>2</sub>O

| H <sub>2</sub> O | 1    | 2    | 3    | 4    | 5    | 6    | 8    | 10   | 15    | 20    |
|------------------|------|------|------|------|------|------|------|------|-------|-------|
| $d/\text{\AA}$   | 7.26 | 7.30 | 7.40 | 7.48 | 7.51 | 7.79 | 8.51 | 9.78 | 10.66 | 11.59 |



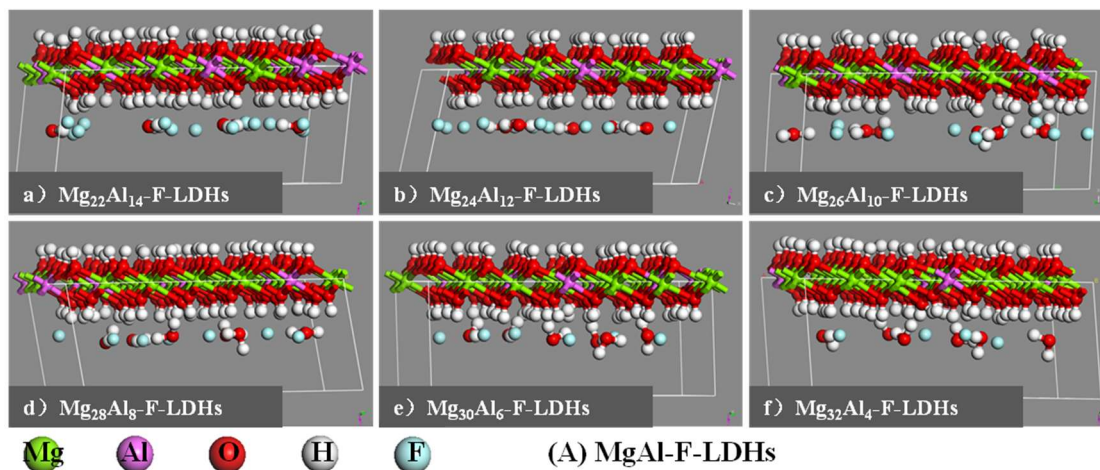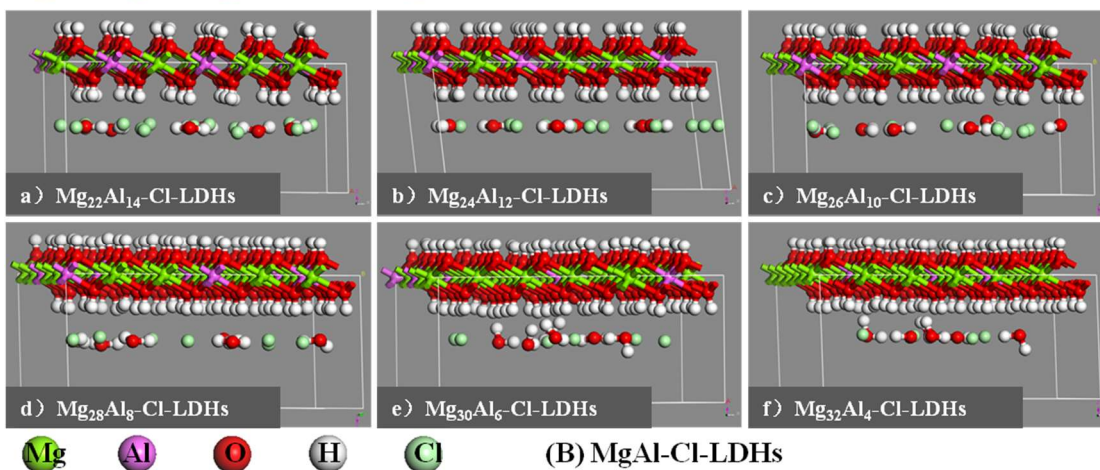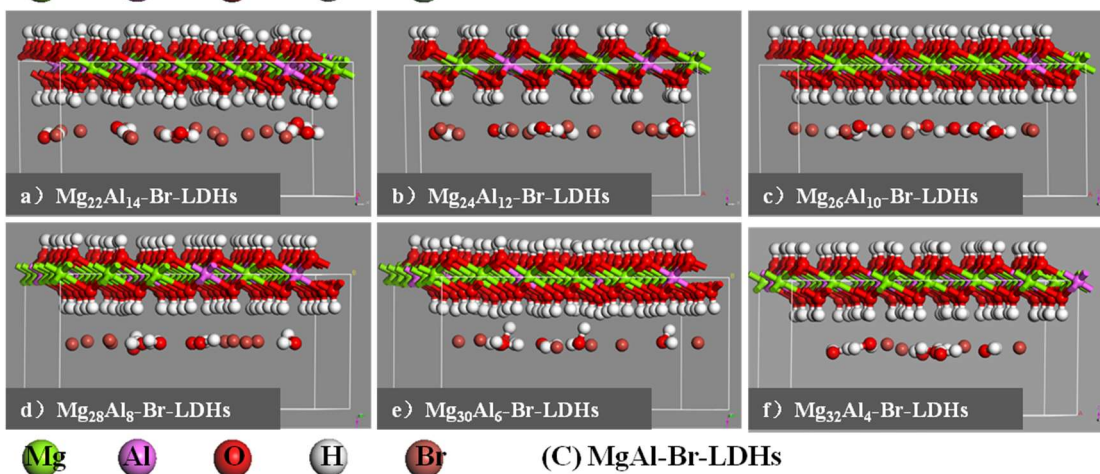

1

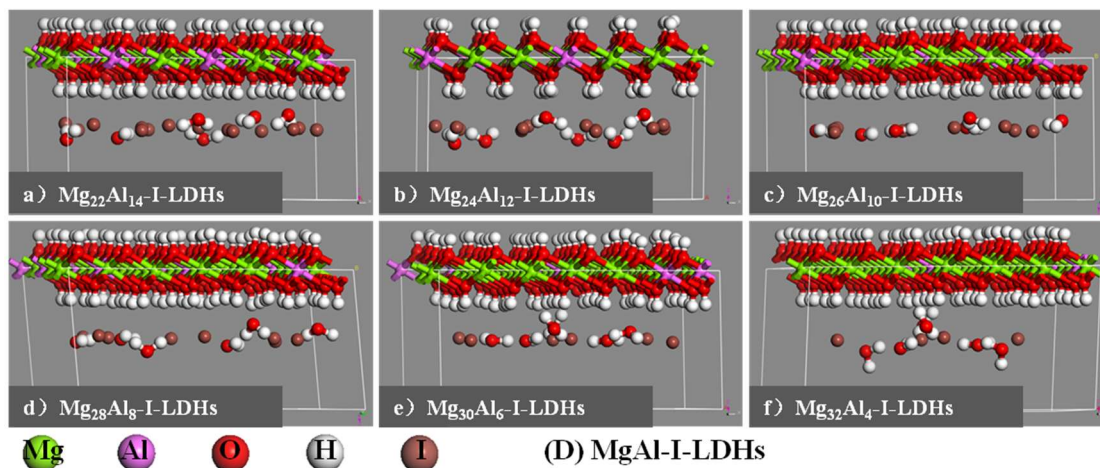

2

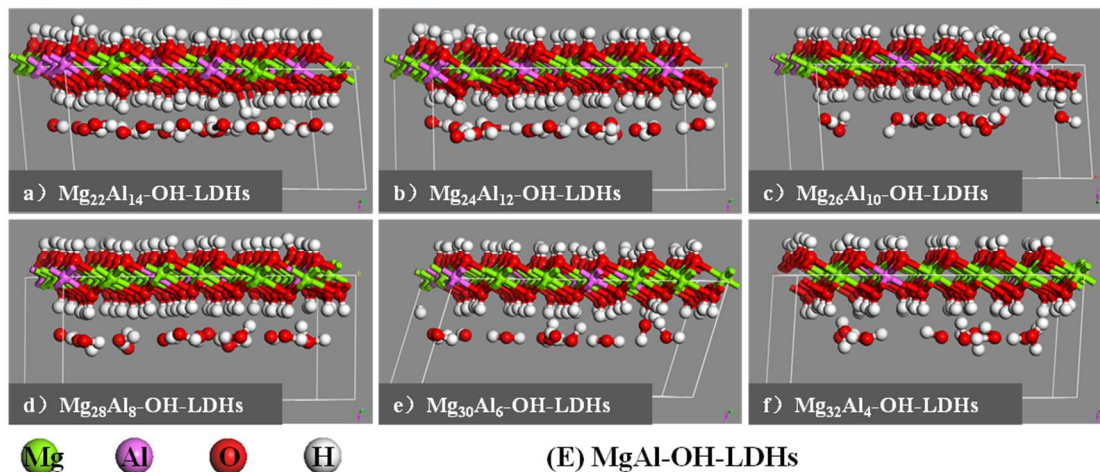

3

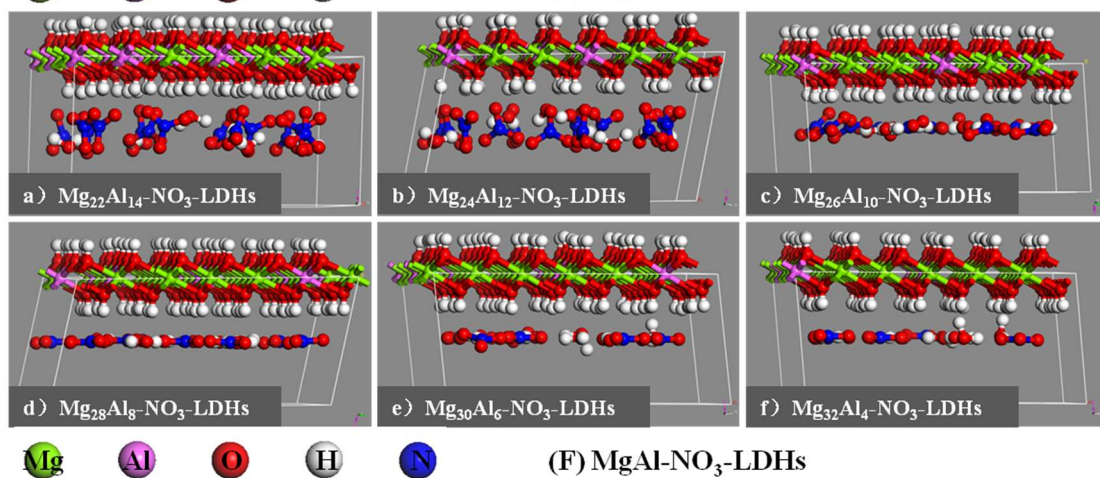



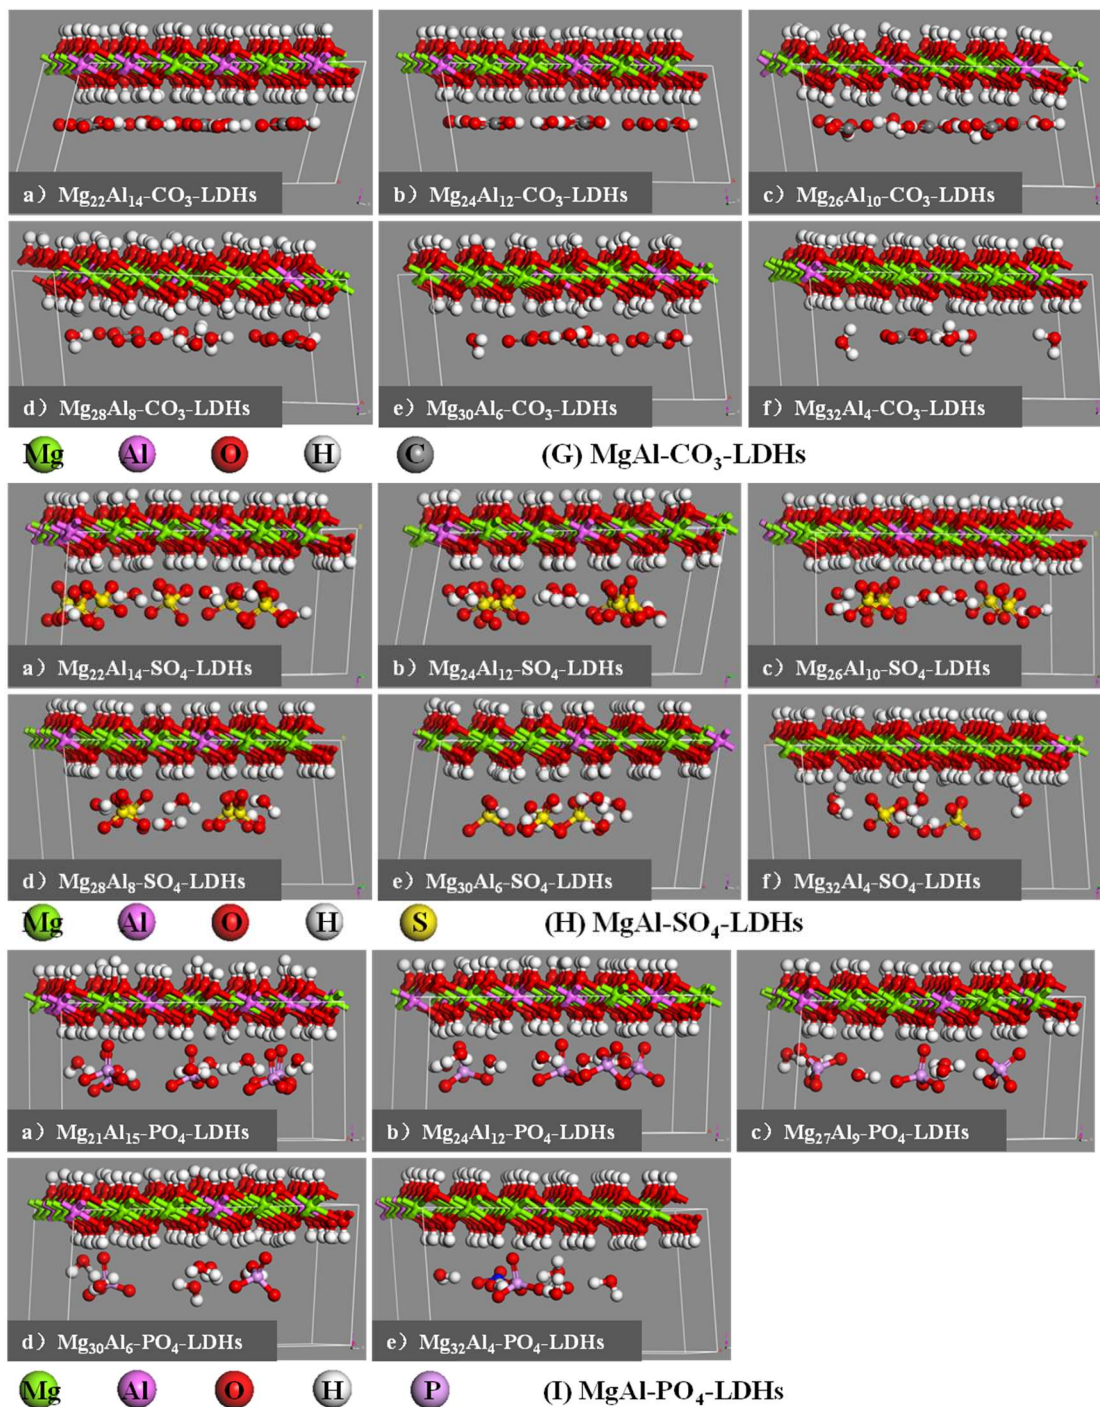

**Fig. S4.** The optimized structures of  $Mg_nAl-A$ -LDHs intercalated with different anions (  $A = F^-$ ,  $Cl^-$ ,  $Br^-$ ,  $I^-$ ,  $OH^-$ ,  $NO_3^-$ ,  $CO_3^{2-}$ ,  $SO_4^{2-}$ ,  $PO_4^{3-}$ ), for monovalent anions and divalent anions,  $n=1.6, 2.0, 2.6, 3.5, 5.0$  and  $8.0$ ; for trivalent anions,  $n=1.4, 2.0, 3.0, 5.0$  and  $8.0$ ). The color of each element is listed.

1    ***The effect of the charges of the interlayer anions on the binding energies of MgAl-LDHs***

2        The binding energy decreases when  $R$  increasing. But the binding energies of the LDHs with different-  
3 charged anions at the same  $R$  are apparently different, changing as the following sequence: trivalent >  
4 divalent > monovalent, which indicates that the binding energy is mainly affected by the anions' charge.  
5 The higher the anion charge is, the stronger affinity between LDHs hosts and guests, leading to the easier  
6 for the anions to intercalate into the interlayer space. This is in accordance with the fact that the anions  
7 with higher charge are easier to be introduced in to the LDHs interlayer.<sup>47, 52</sup>

8



1

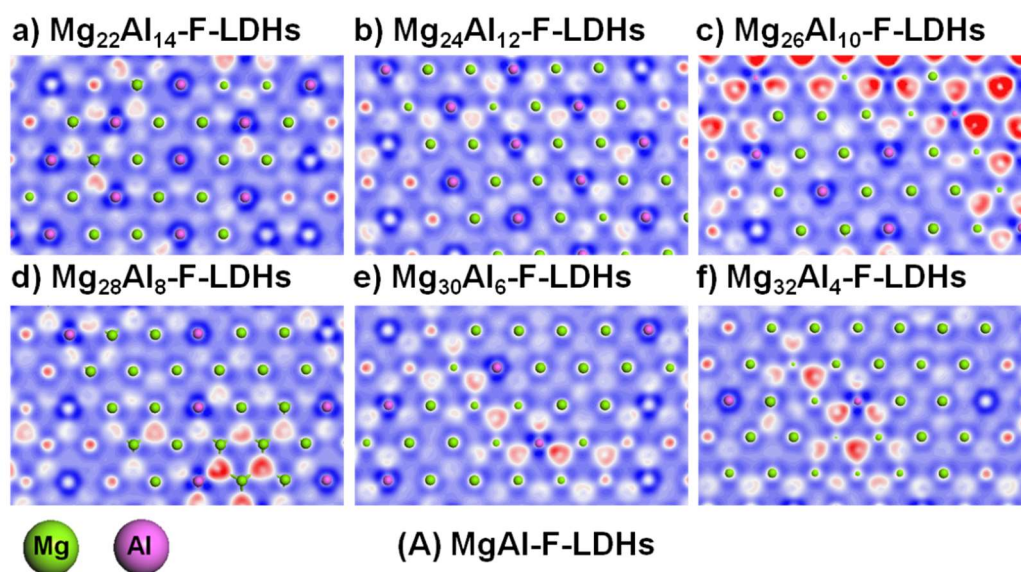

2

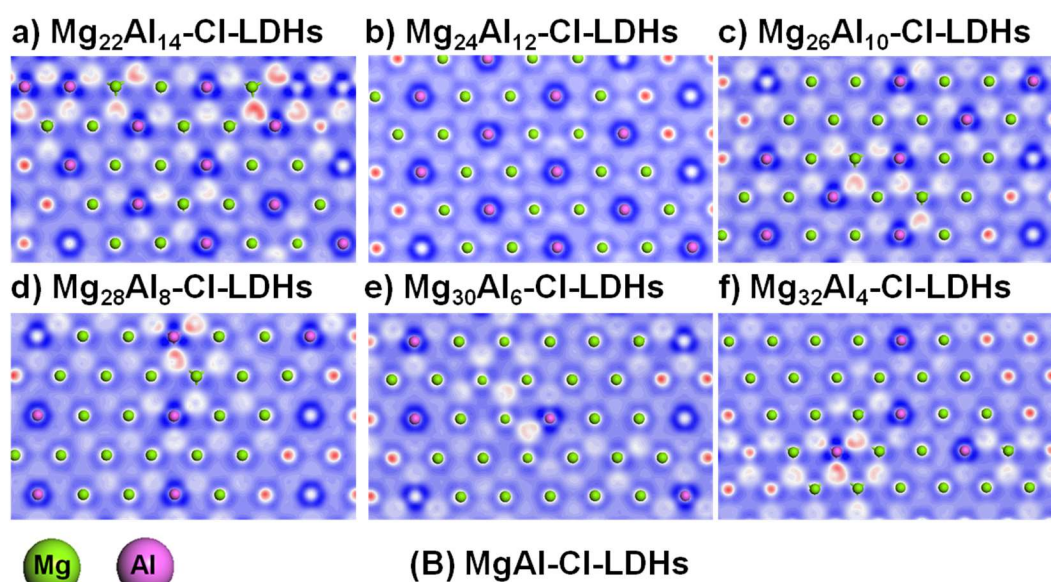

3

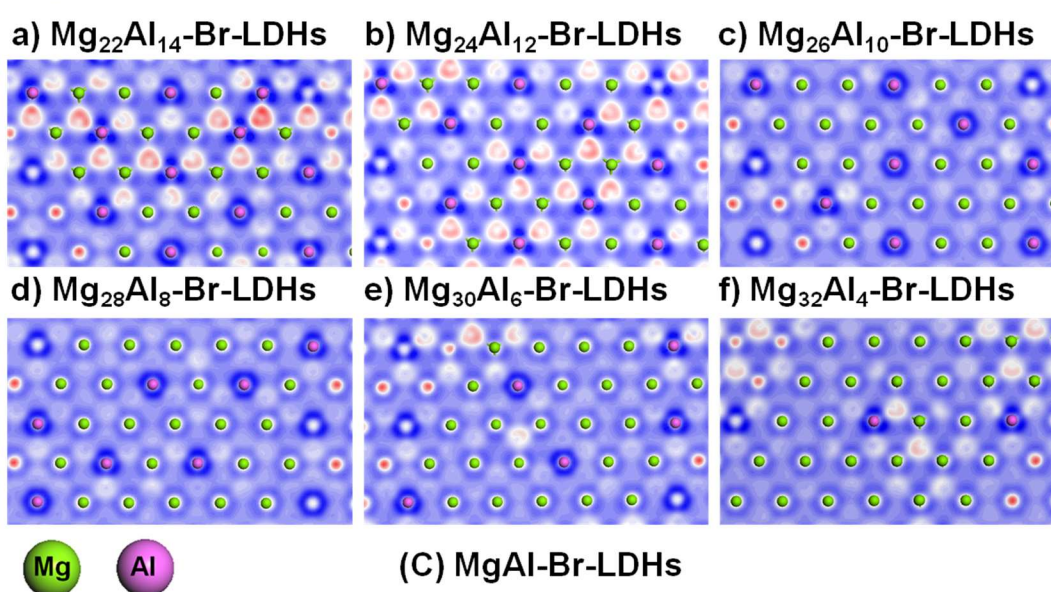

4



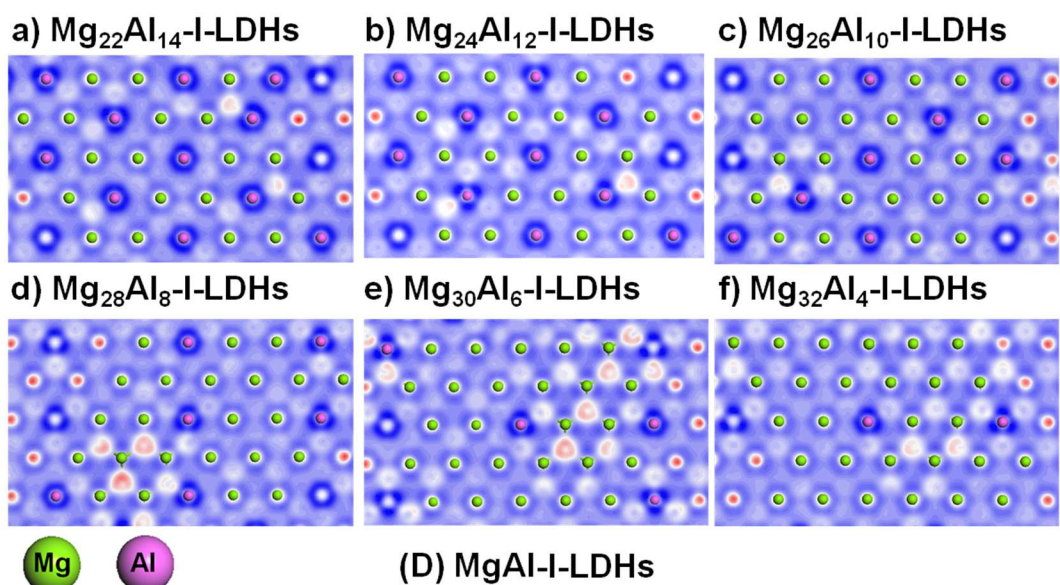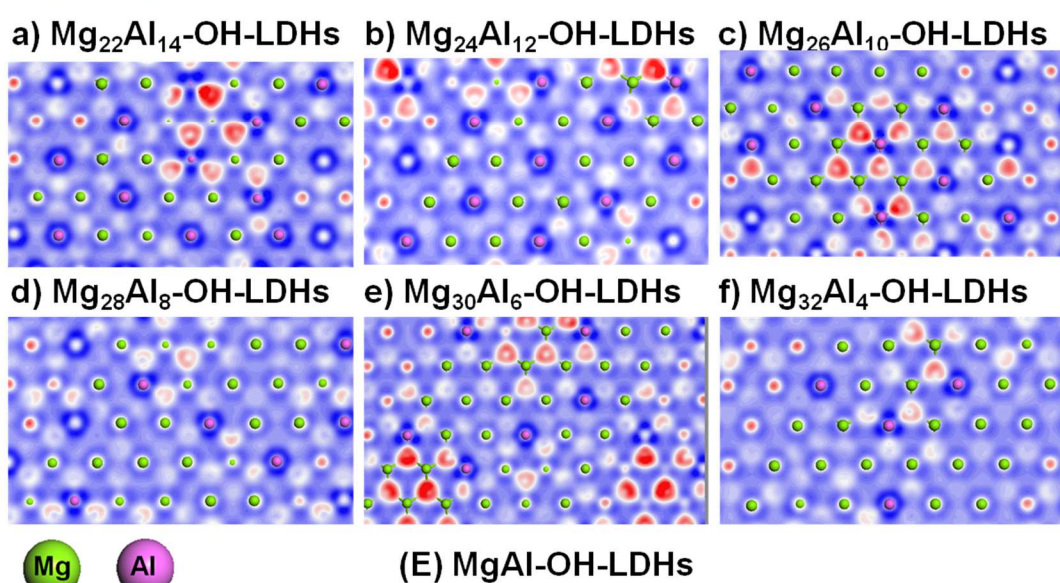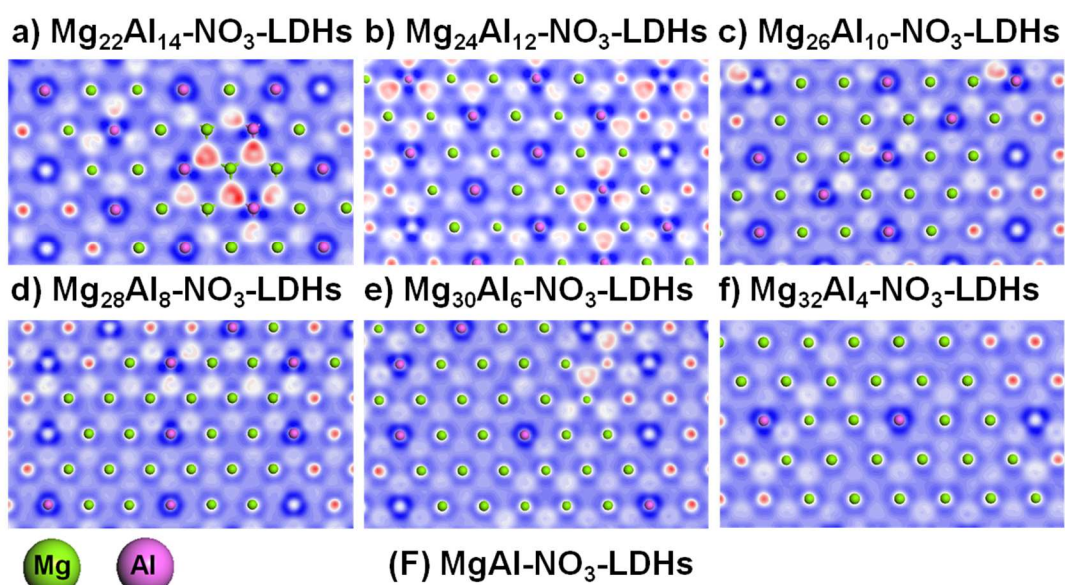



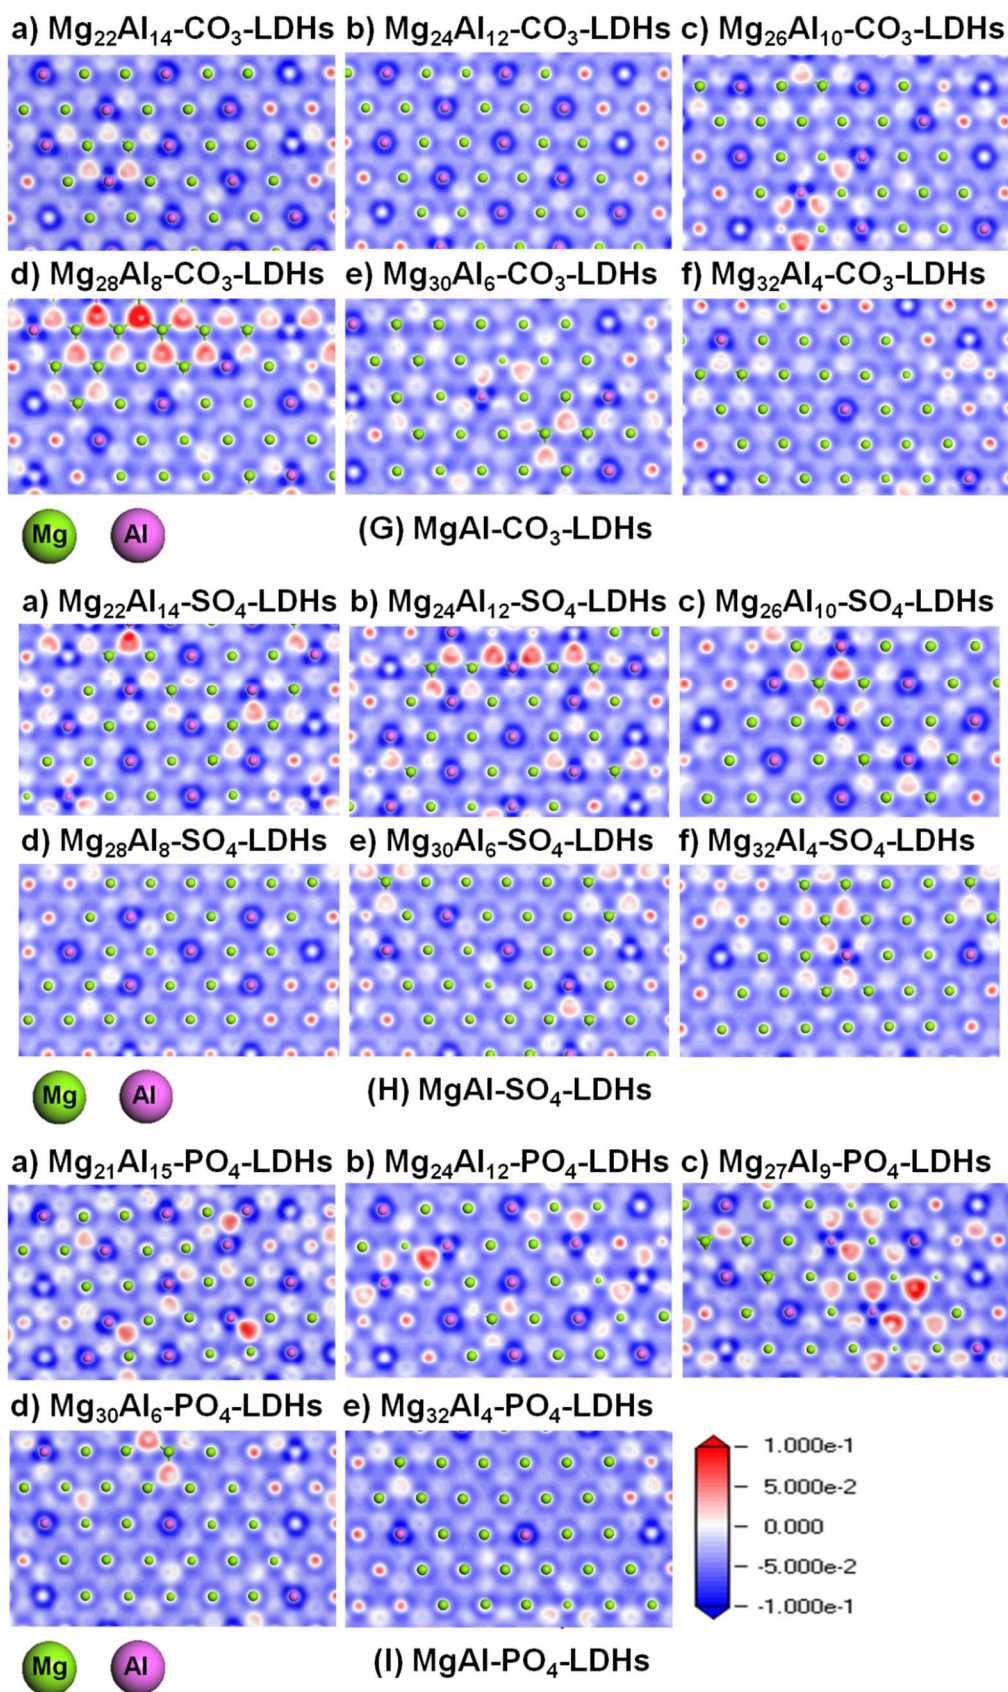

**Fig. S5.** The electronic density difference of layers of MgAl-A-LDHs interlayered with different anions (A=  $\text{F}^-$ ,  $\text{Cl}^-$ ,  $\text{Br}^-$ ,  $\text{I}^-$ ,  $\text{OH}^-$ ,  $\text{NO}_3^-$ ,  $\text{CO}_3^{2-}$ ,  $\text{SO}_4^{2-}$ ,  $\text{PO}_4^{3-}$ ) and different  $R$  ( $\text{Mg}^{2+}/\text{Al}^{3+}$ ) under the top view. The color of each element is listed.

## 1 *The interaction between interlayer anions and water molecules*

2 Fig. S6 shows the electron density difference of the interlayer species of Mg<sub>2</sub>Al-A-LDHs with  
3 different anions with  $R=2$  (For other  $R$  values, see Fig. S7, ESI†). As shown, there are depletion  
4 (blue) or increase (red) of electronic density around the anions and water molecules, respectively.  
5 In the case of halogen, the red color of the regions becomes more and more light in the order  $F^-$ ,  
6  $Cl^-$ ,  $Br^-$ ,  $I^-$ , showing that the charge accumulation of halogen is in the order  $I^- < Br^- < Cl^- < F^-$ .  
7 (Fig. S6a-d) This is consistent with the order of the binding energies of halogen-containing LDHs,  
8  $I^- < Br^- < Cl^- < F^-$ , as mentioned in 3.3. For the remaining oxygen acid anions ( $NO_3^-$ ,  $CO_3^{2-}$ ,  $SO_4^{2-}$ ,  
9  $PO_4^{3-}$ , Fig. S6f-i), the red regions are around O, while the regions around N, C, S, P are in blue,  
10 demonstrating  $sp^n$  hybrid of these atoms. Furthermore, among the oxygen acid anions,  $CO_3^{2-}$  has  
11 the most significant charge accumulation with the deepest red color for O atoms (Fig. S6g), which  
12 agrees well with the fact that  $CO_3$ -LDHs are the most common LDHs in nature.<sup>S8</sup> It also can be  
13 seen that the blue regions around water molecules are contributed by H atom, while red is coming  
14 from O, blue and red areas overlap to display the shape of  $sp^3$  hybrid orbital in  $H_2O$ . And the blue  
15 regions of water border on the red region of the anions (coming from halogen anions or O atoms of  
16 the oxygen acid anions and  $OH^-$ ), thus the interaction between the interlayer anions and water is  
17 mainly derived from the interaction between the H atom ( $H^\delta+$ ) of water and halogen anions (X) or O  
18 atoms within oxygen acid anions and  $OH^-$ , where the electronic density of H of water decrease and  
19 those of the halogen anions or O within oxygen acid anions and  $OH^-$  increase. The distances of the  
20 interacted atoms ( $d_{X \cdots H^\delta+}$  and  $d_{O \cdots H^\delta+}$ ) are also displayed in Fig. S6. As shown, except for  $I^-$ , the  
21 distances are in the range from 1.5 to 2.5 Å, which can be classified to length of hydrogen bond.<sup>56</sup>  
22 For halogen anions, the  $X \cdots H^\delta+$  length becomes longer in the  $I^- > Br^- > Cl^- > F^-$ , indicating the  
23 hydrogen bond become weaker from F to I. For the oxygen acid anions ( $NO_3^-$ ,  $CO_3^{2-}$ ,  $SO_4^{2-}$ ,  $PO_4^{3-}$ )  
24 and  $OH^-$ ,  $O \cdots H$  shows the shortest length (strongest hydrogen bond) in  $CO_3^{2-}$ -LDH. These results



1 also accord to the experimental findings mentioned above. Therefore, according to the definition of  
 2 hydrogen bond (IUPAC Recommendations 2011),<sup>57</sup> it also can be deduced that the interaction  
 3 between interlayer anions and water molecules are mainly coming from the electrostatic attraction.

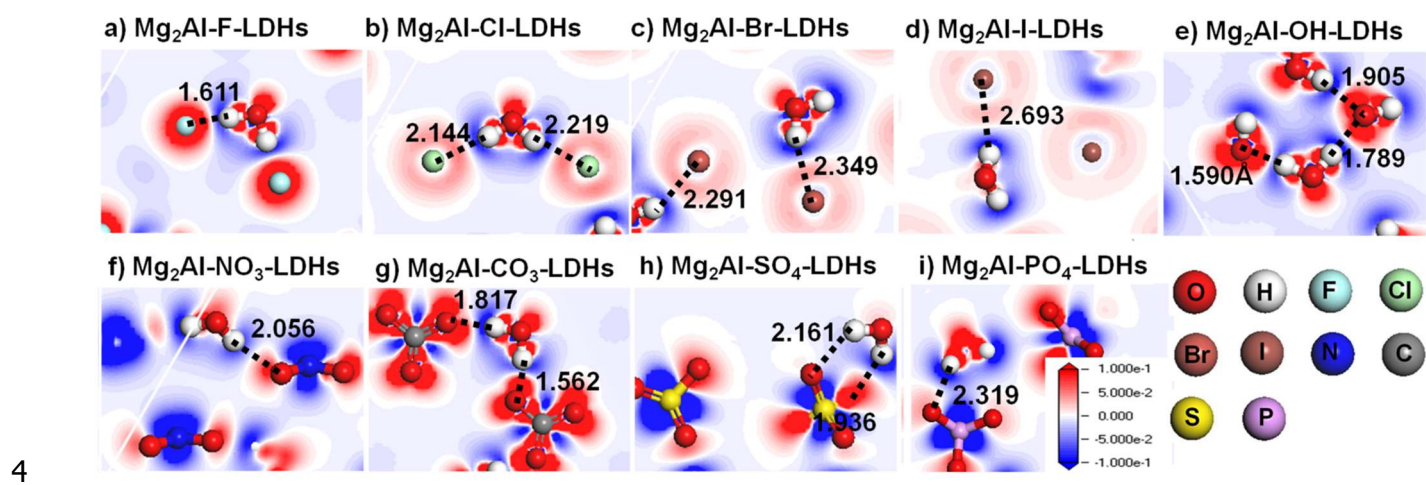

5 **Fig. S6.** The electronic density difference of interlayer species of  $\text{Mg}_2\text{Al-A-LDHs}$  interlayered with different  
 6 anions ( $\text{A} = \text{F}^-$ ,  $\text{Cl}^-$ ,  $\text{Br}^-$ ,  $\text{I}^-$ ,  $\text{OH}^-$ ,  $\text{NO}_3^-$ ,  $\text{CO}_3^{2-}$ ,  $\text{SO}_4^{2-}$  and  $\text{PO}_4^{3-}$ ) under the top view, along with the distances  
 7 between the H atom (H) of water and halogen anions (X) ( $d_{\text{X-H}}$ ) or O atoms within oxygen acid  
 8 anions ( $d_{\text{O-H}}$ ) (in Å).  
 9

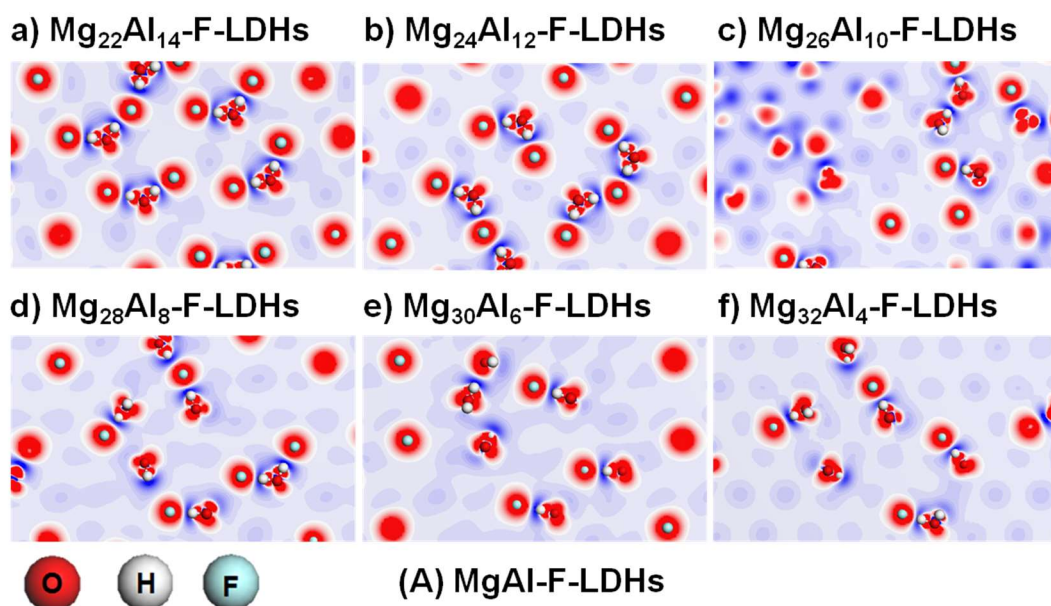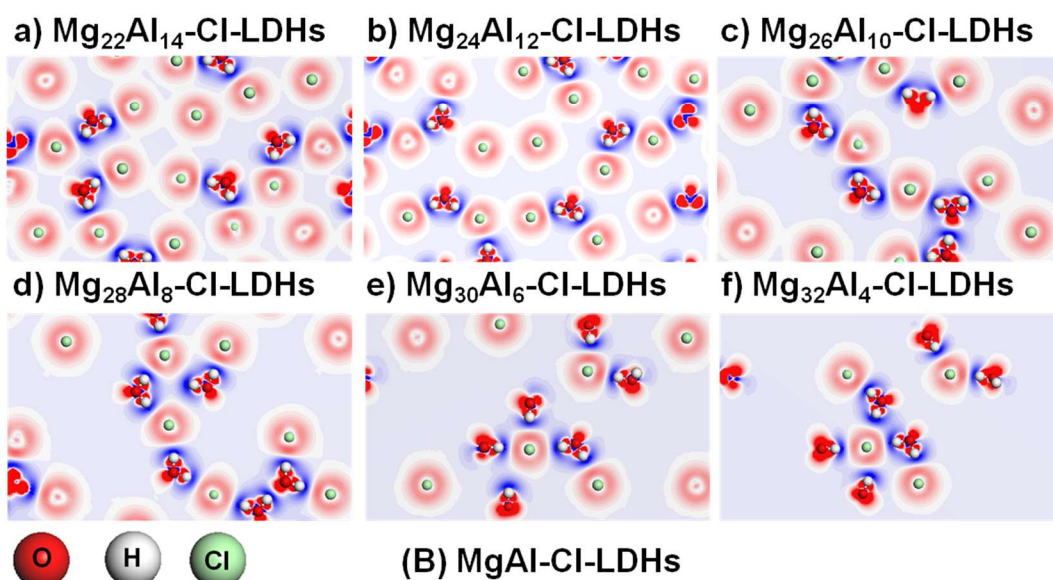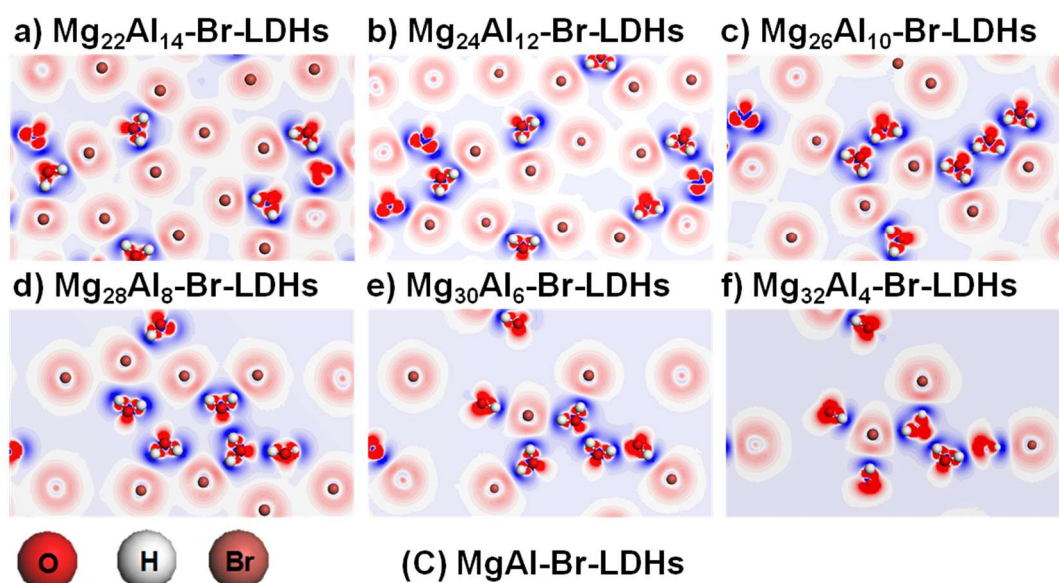



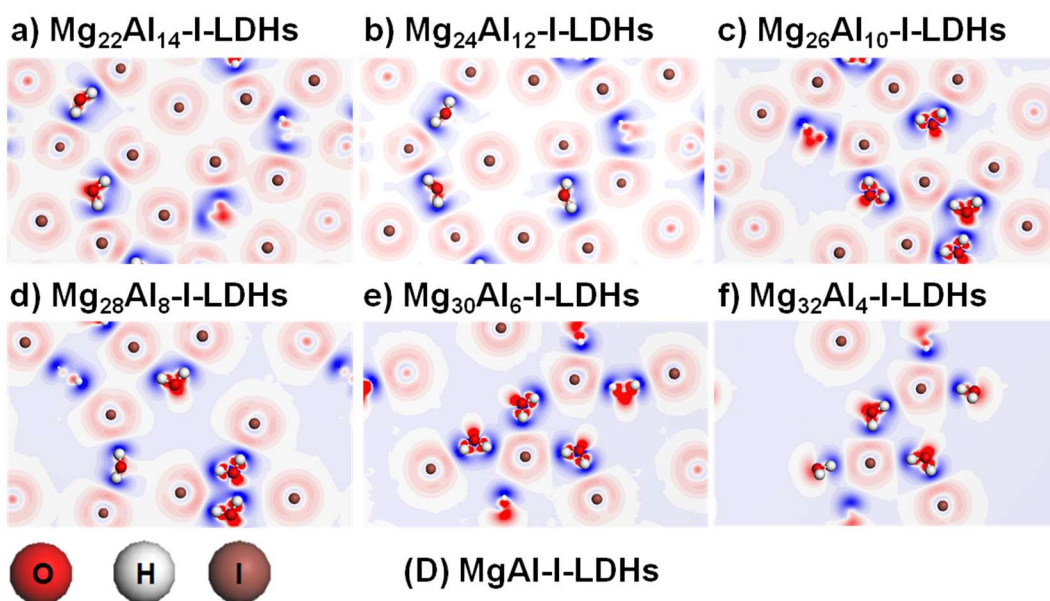

13

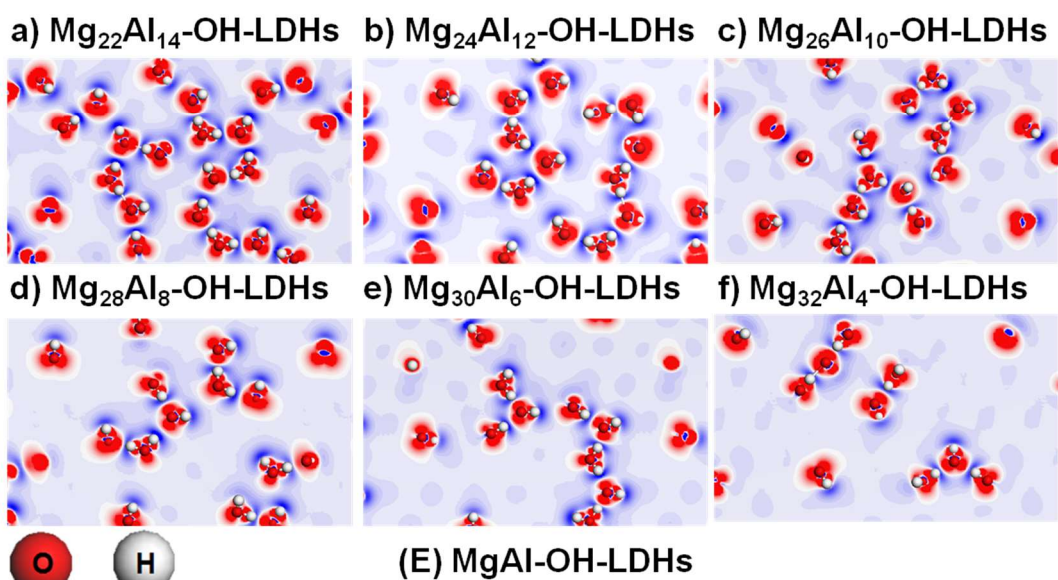

14

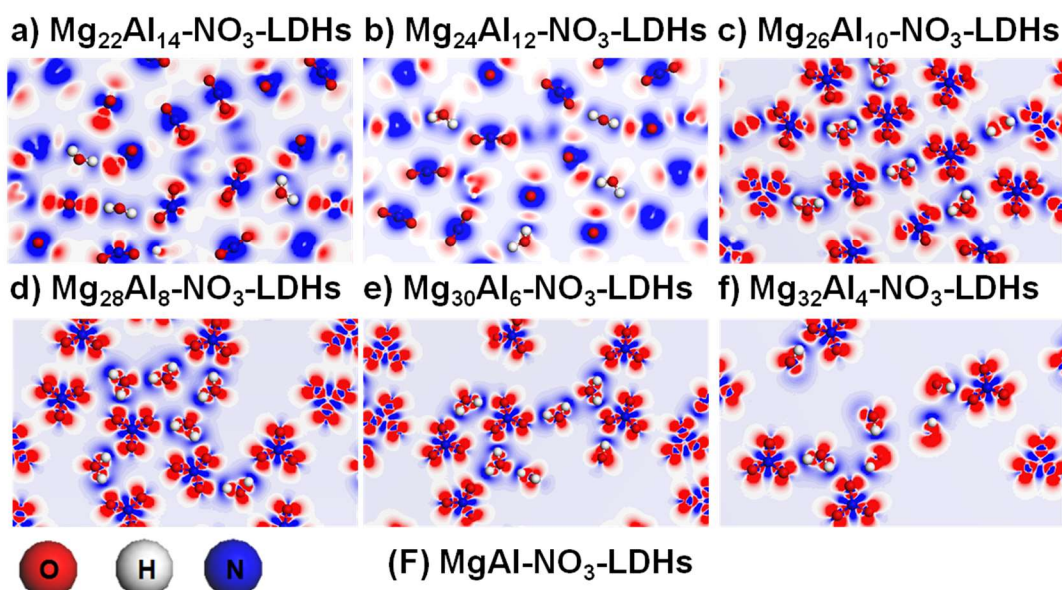

15

a)  $\text{Mg}_{22}\text{Al}_{14}\text{-CO}_3\text{-LDHs}$  b)  $\text{Mg}_{24}\text{Al}_{12}\text{-CO}_3\text{-LDHs}$  c)  $\text{Mg}_{26}\text{Al}_{10}\text{-CO}_3\text{-LDHs}$

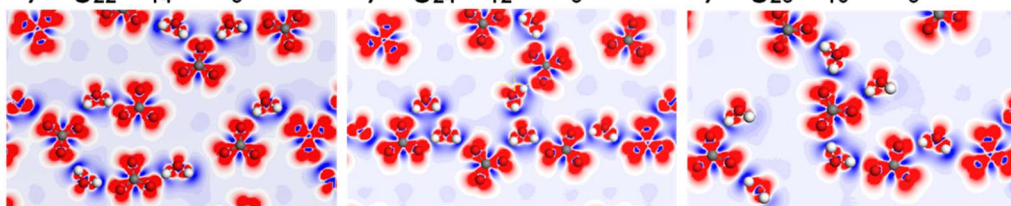

d)  $\text{Mg}_{28}\text{Al}_8\text{-CO}_3\text{-LDHs}$  e)  $\text{Mg}_{30}\text{Al}_6\text{-CO}_3\text{-LDHs}$  f)  $\text{Mg}_{32}\text{Al}_4\text{-CO}_3\text{-LDHs}$

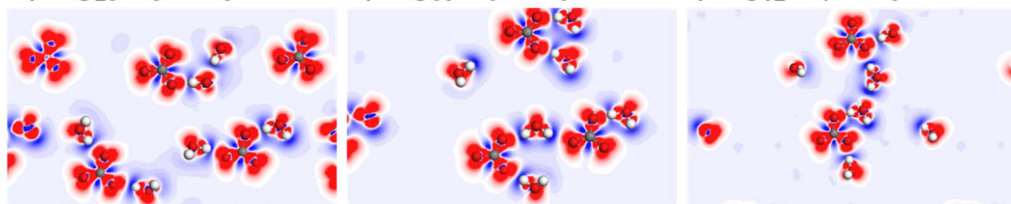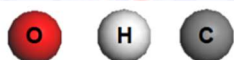

(G)  $\text{MgAl-CO}_3\text{-LDHs}$

a)  $\text{Mg}_{22}\text{Al}_{14}\text{-SO}_4\text{-LDHs}$  b)  $\text{Mg}_{24}\text{Al}_{12}\text{-SO}_4\text{-LDHs}$  c)  $\text{Mg}_{26}\text{Al}_{10}\text{-SO}_4\text{-LDHs}$

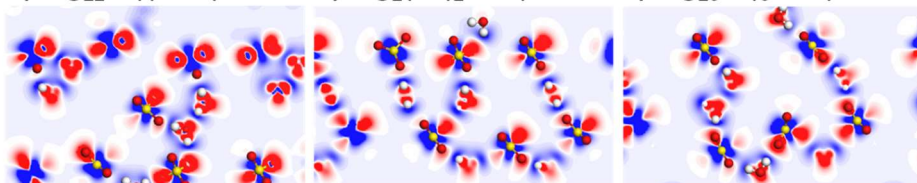

d)  $\text{Mg}_{28}\text{Al}_8\text{-SO}_4\text{-LDHs}$  e)  $\text{Mg}_{30}\text{Al}_6\text{-SO}_4\text{-LDHs}$  f)  $\text{Mg}_{32}\text{Al}_4\text{-SO}_4\text{-LDHs}$

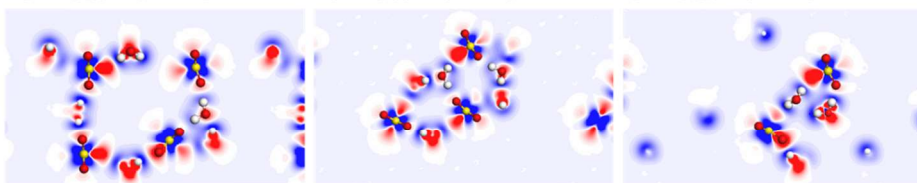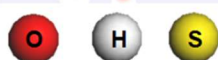

(H)  $\text{MgAl-SO}_4\text{-LDHs}$

a)  $\text{Mg}_{21}\text{Al}_{15}\text{-PO}_4\text{-LDHs}$  b)  $\text{Mg}_{24}\text{Al}_{12}\text{-PO}_4\text{-LDHs}$  c)  $\text{Mg}_{27}\text{Al}_9\text{-PO}_4\text{-LDHs}$

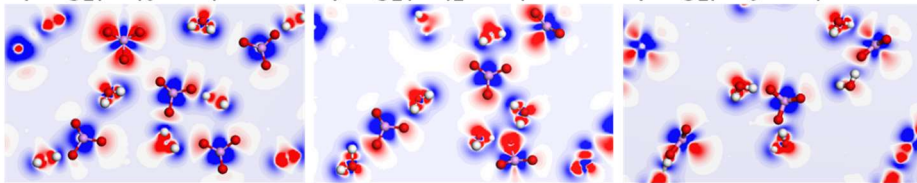

d)  $\text{Mg}_{30}\text{Al}_6\text{-PO}_4\text{-LDHs}$  e)  $\text{Mg}_{32}\text{Al}_4\text{-PO}_4\text{-LDHs}$

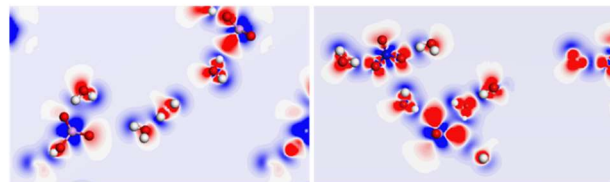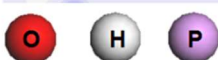

(I)  $\text{MgAl-PO}_4\text{-LDHs}$

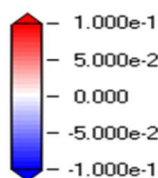

**Fig. S7.** The electronic density difference of interlayer species of  $\text{MgAl-A-LDHs}$  interlayered with different anions ( $A = \text{F}^-, \text{Cl}^-, \text{Br}^-, \text{I}^-, \text{OH}^-, \text{NO}_3^-, \text{CO}_3^{2-}, \text{SO}_4^{2-}, \text{PO}_4^{3-}$ ) and different  $R$  ( $\text{Mg}^{2+}/\text{Al}^{3+}$ ) under the top view. The color of each element is listed.



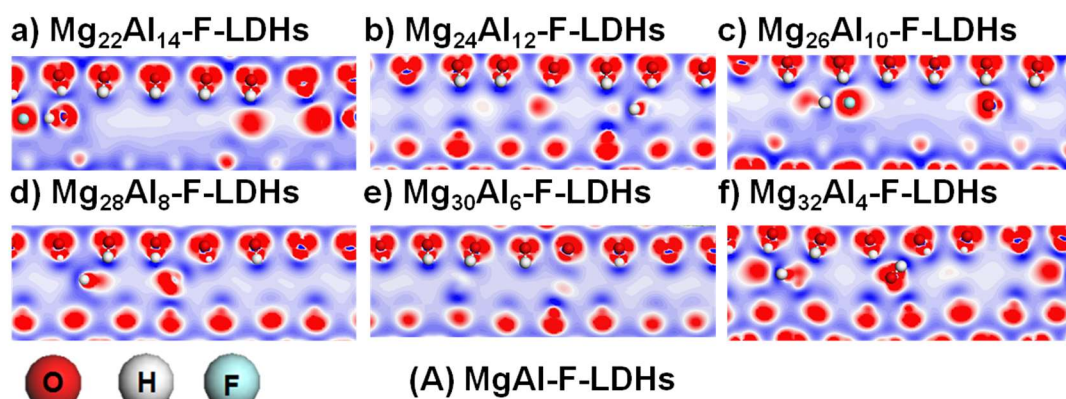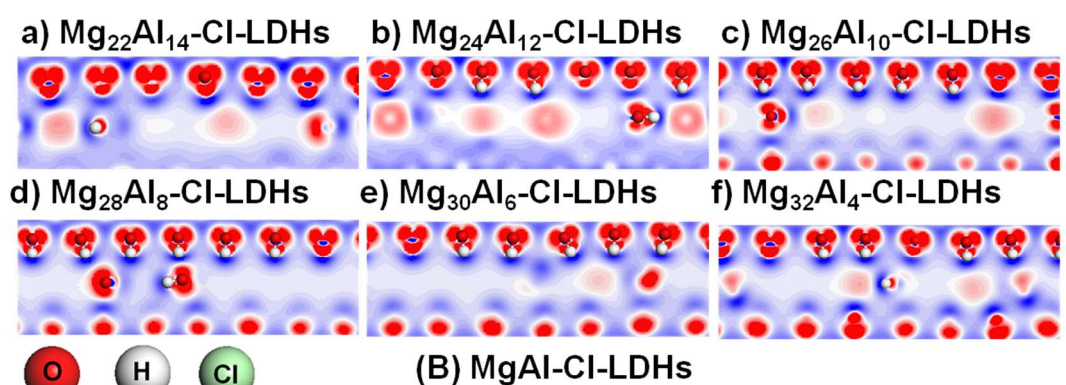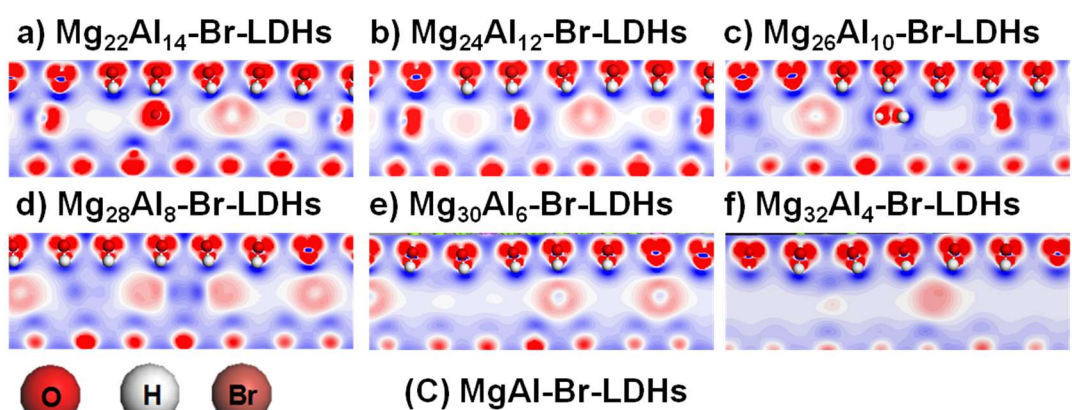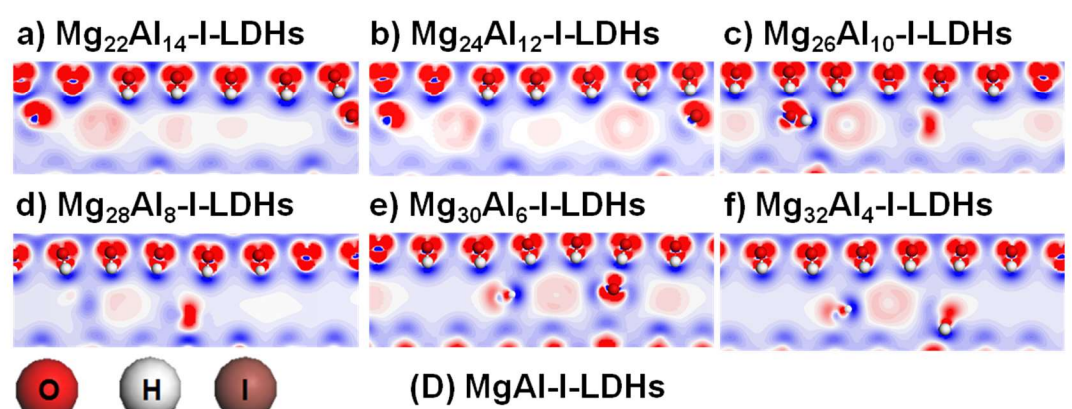

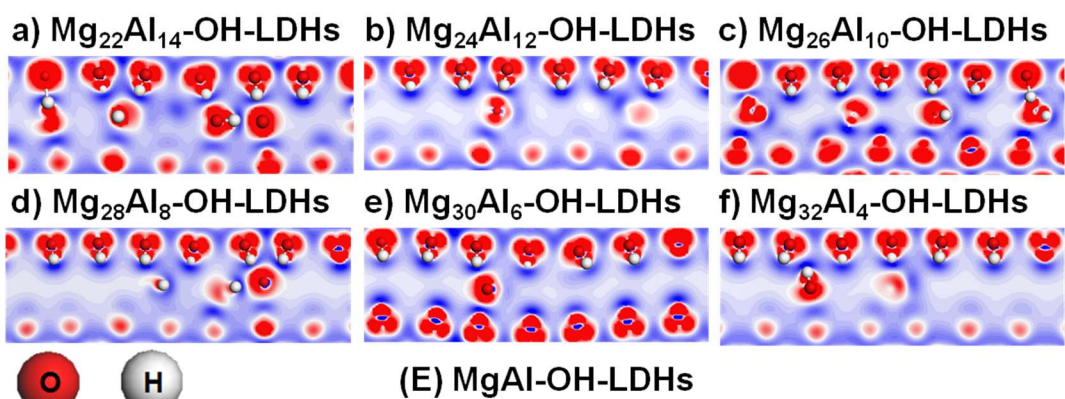

26

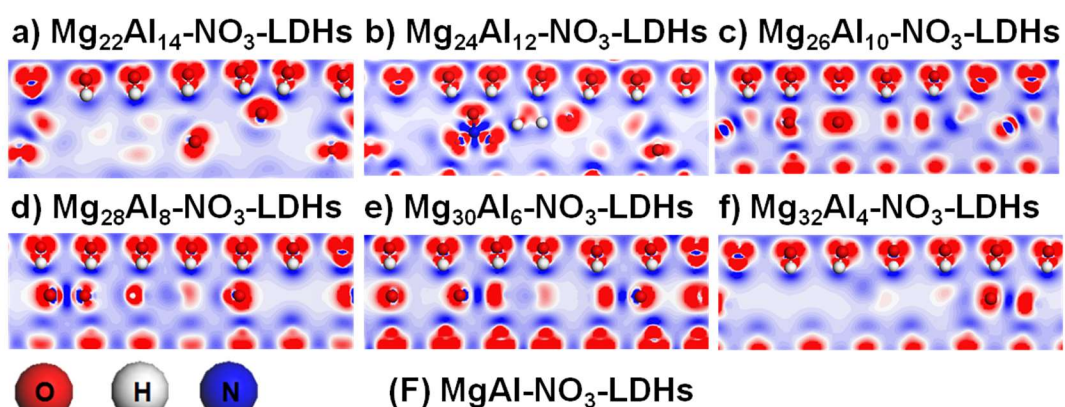

27

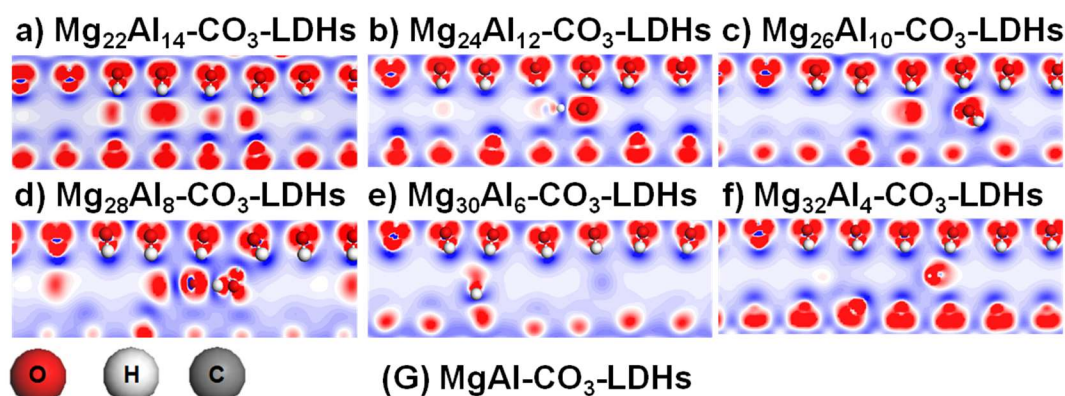

28



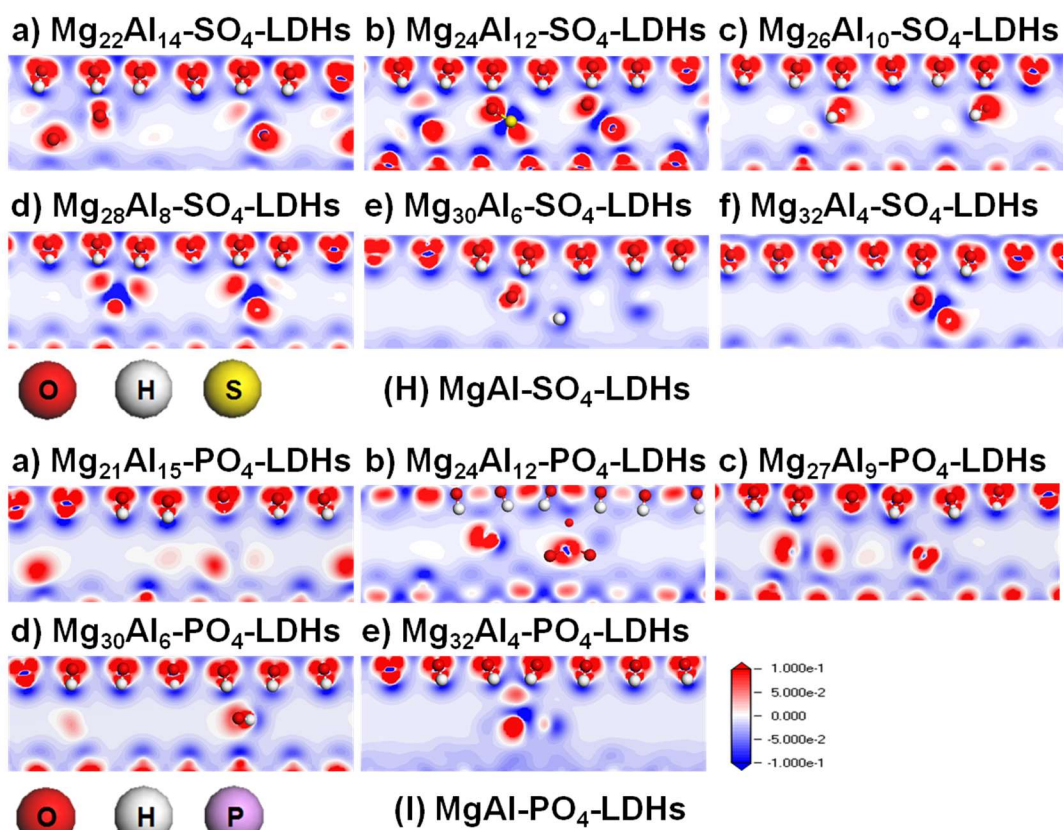

**Fig. S8.** The electronic density difference of the layer and interlayer species of  $\text{MgAl-A-LDHs}$  interlayered with different anions ( $\text{A} = \text{F}^-$ ,  $\text{Cl}^-$ ,  $\text{Br}^-$ ,  $\text{I}^-$ ,  $\text{OH}^-$ ,  $\text{NO}_3^-$ ,  $\text{CO}_3^{2-}$ ,  $\text{SO}_4^{2-}$ ,  $\text{PO}_4^{3-}$ ) and different  $R$  ( $\text{Mg}^{2+}/\text{Al}^{3+}$ ) (side view). The color of each element is listed.

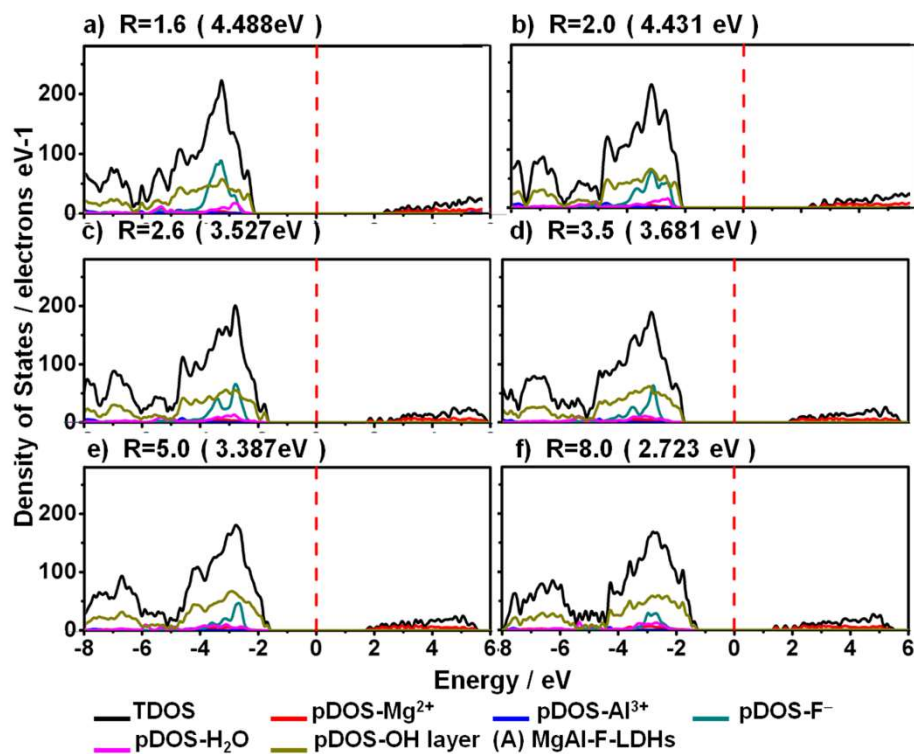

34

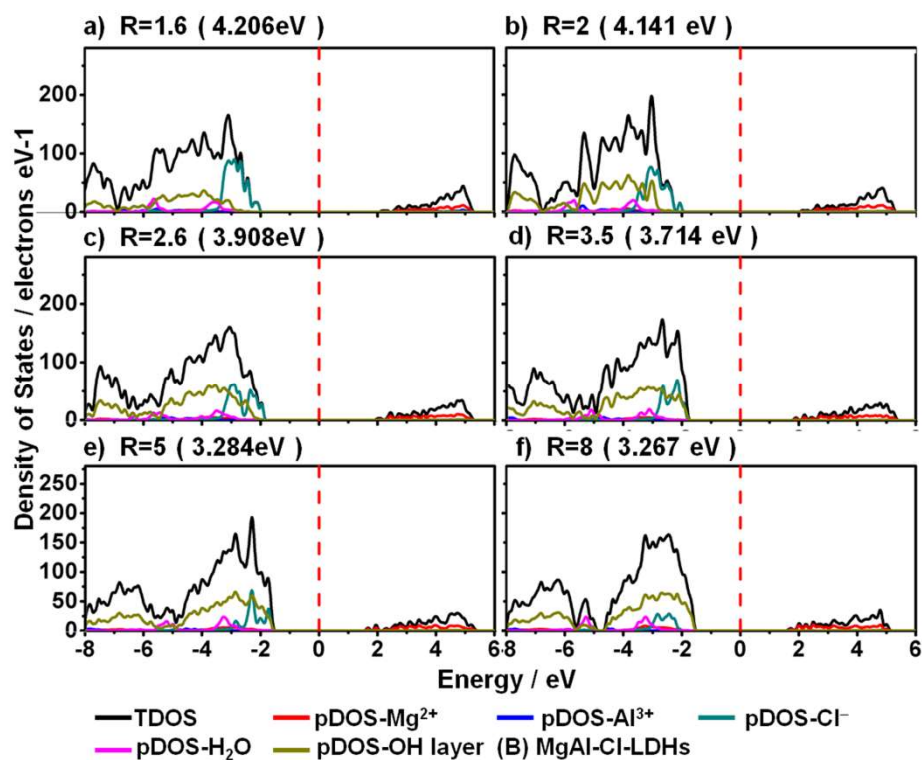

35



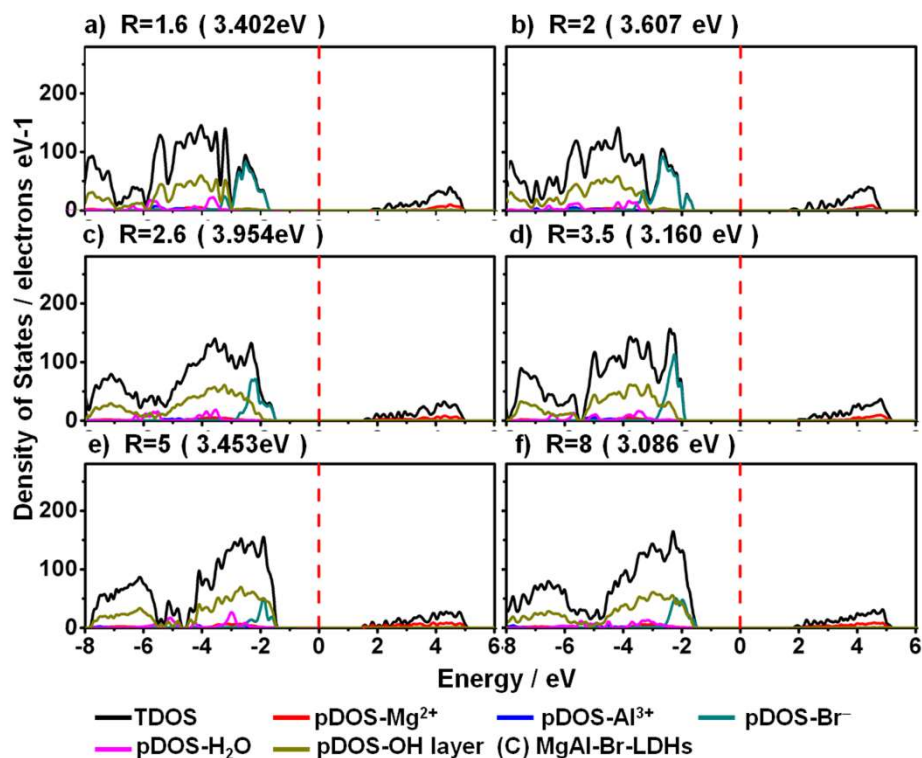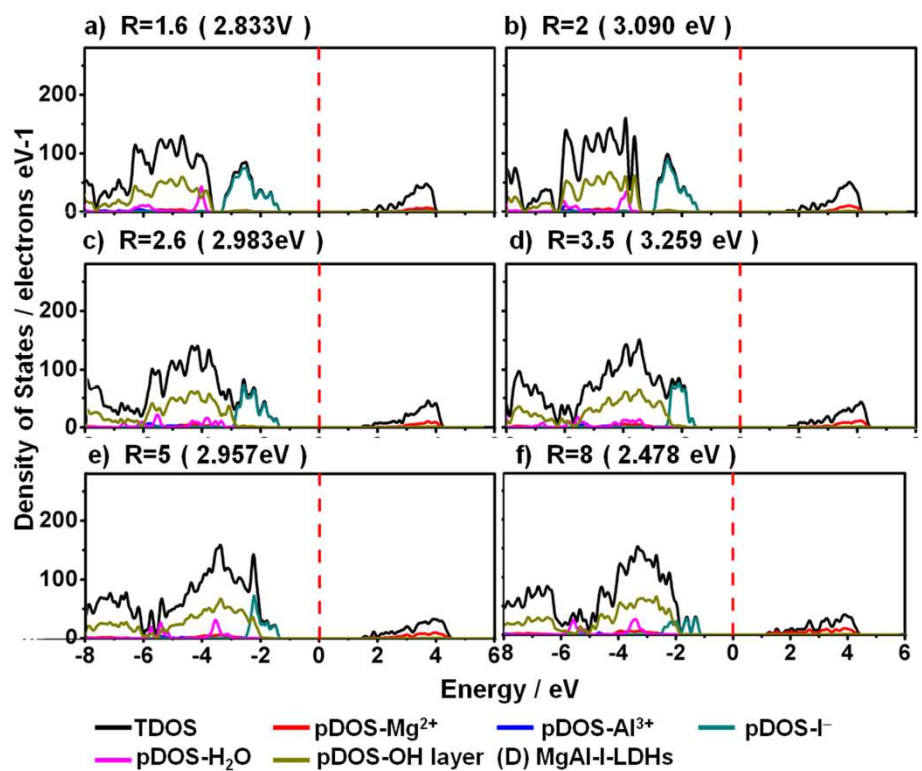

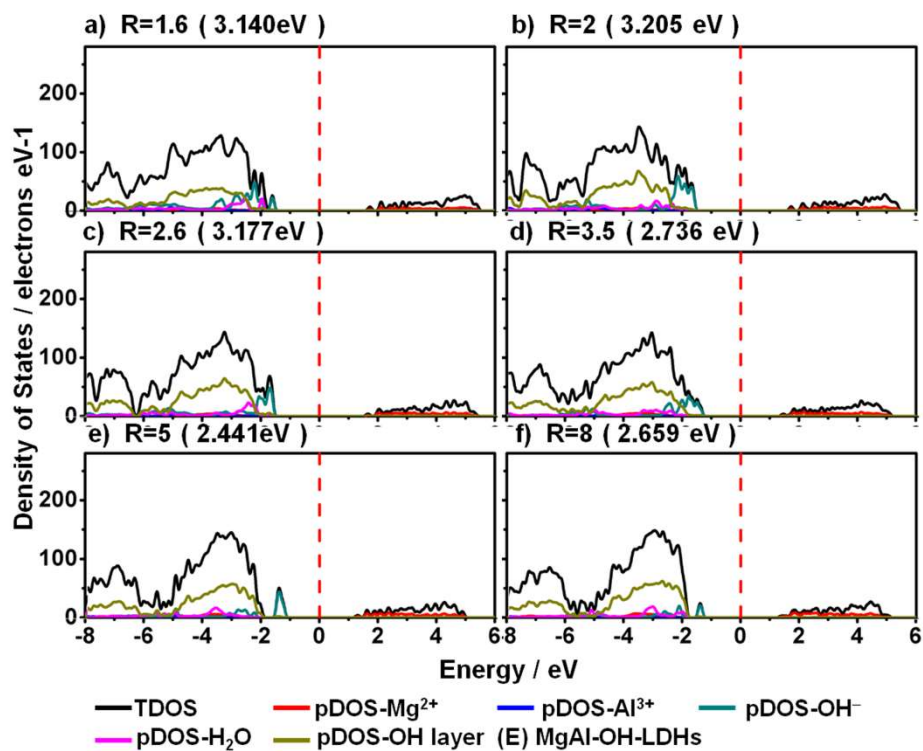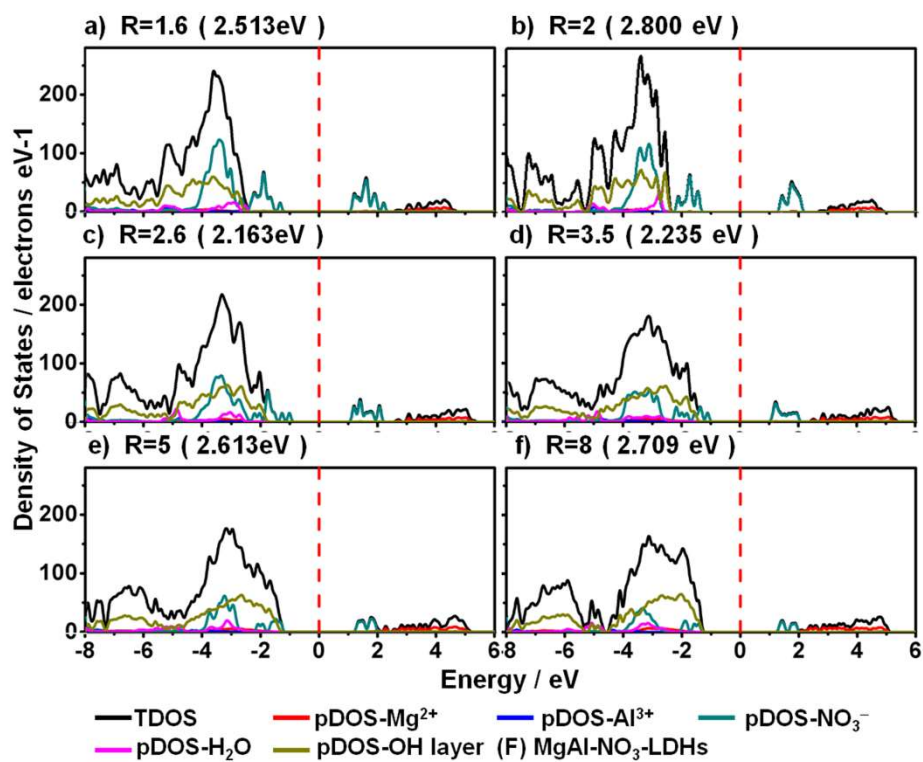

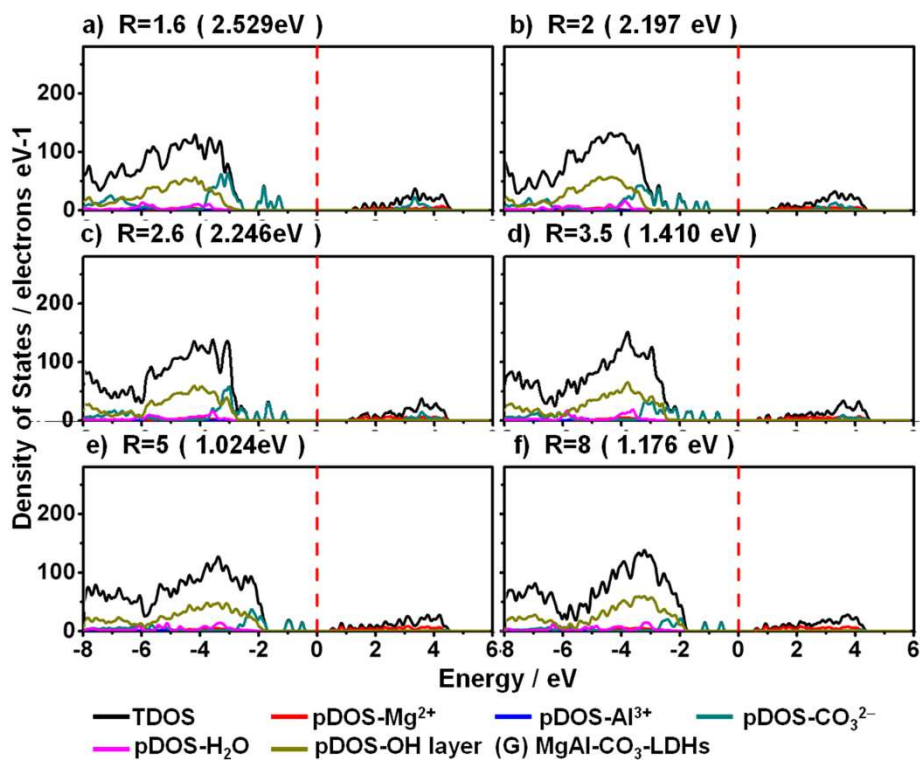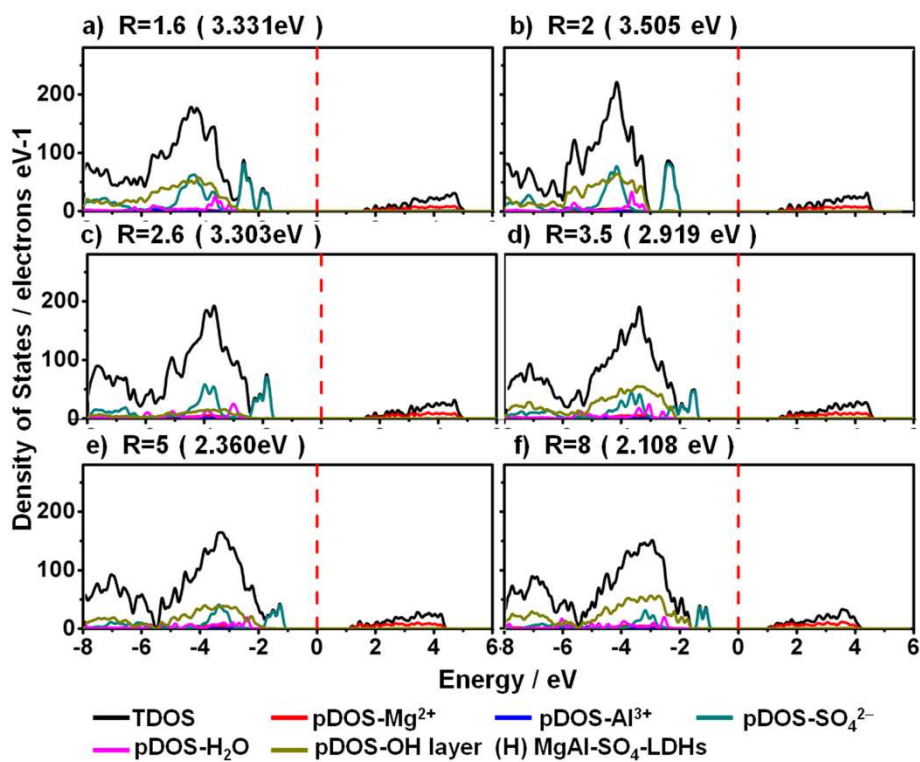

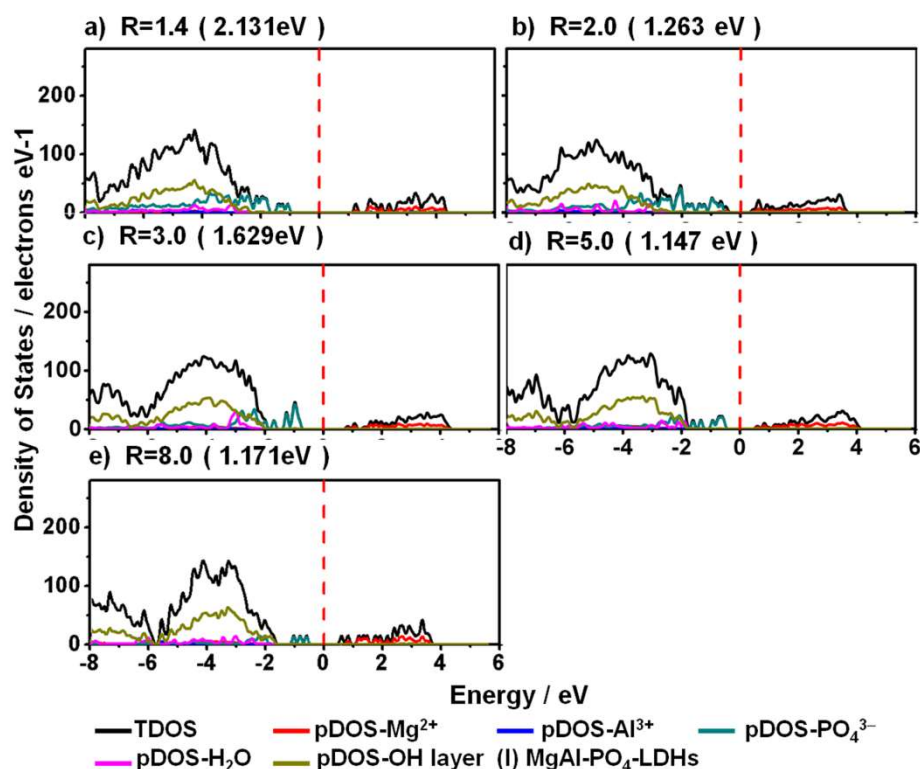

**Fig. S9.** Total density of states (TDOS) and partial density of states (PDOS) for the MgAl-A-LDHs intercalated with different interlayer anions (A= F<sup>-</sup>, Cl<sup>-</sup>, Br<sup>-</sup>, I<sup>-</sup>, OH<sup>-</sup>, NO<sub>3</sub><sup>-</sup>, CO<sub>3</sub><sup>2-</sup>, SO<sub>4</sub><sup>2-</sup>, PO<sub>4</sub><sup>3-</sup>) and different  $R$  (Mg<sup>2+</sup>/Al<sup>3+</sup>). The Fermi energy is shown as a dashed vertical line, and has been set as 0 eV.

## References

- S1 L. Yan, S. Hu, J. M. Duan and C. Y. Jing, *J. Phys. Chem. A*, 2014, **118**, 4759–4765.
- S2 Y. M. Fan, Y. Q. Zhao, Z. W. Zhu, W. Du and L. L. Li, *J. Phys. Chem. A*, 2017, **121**, 7385–7329.
- S3 A. Arnold, V. Tersikh and Q. Y. Li, *J. Phys. Chem. C*, 2013, **117**, 25733–25741.
- S4 H. Yan, M. Wei, J. Ma, D. G. Evans and X. Duan, *J. Phys. Chem. A*, 2010, **114**, 7369–7376.

- 55 S5 S. Aisawa, S. Takahashi, W. Ogasawara, Y. Umatsu and E. Naruta, *J. Solid State*  
56 *Chem.*, 2001, **162**, 52–62.
- 57 S6 A. Dias, L. Cunha and A. C. Vieira, *Mater. Res. Bull.*, 2011, **46**, 1346–1351.
- 58 S7 F. Cavani, F. Trifrio and A. Vaccari, *Catal. Today*, 1991, **11**, 173–301.
- 59 S8 S. Ishihara, P. Sahoo, K. Deguchi, S. Ohki, M. Tansho, T. Shimizu, J. Labuta, J. P. Hill, K. Ariga, K. Watanabe, Y. Yamauchi, S. Suehara and N. Iyi, *J. Am. Chem. Soc.*, 2013, **135**, 18040–18043.
